# Supplementary material
Source: PubMed Central journal article supplement (PMC7313619)
Supplement: NIHMS1577153-supplement-2.pdf [file NIHMS1577153-supplement-2.pdf]

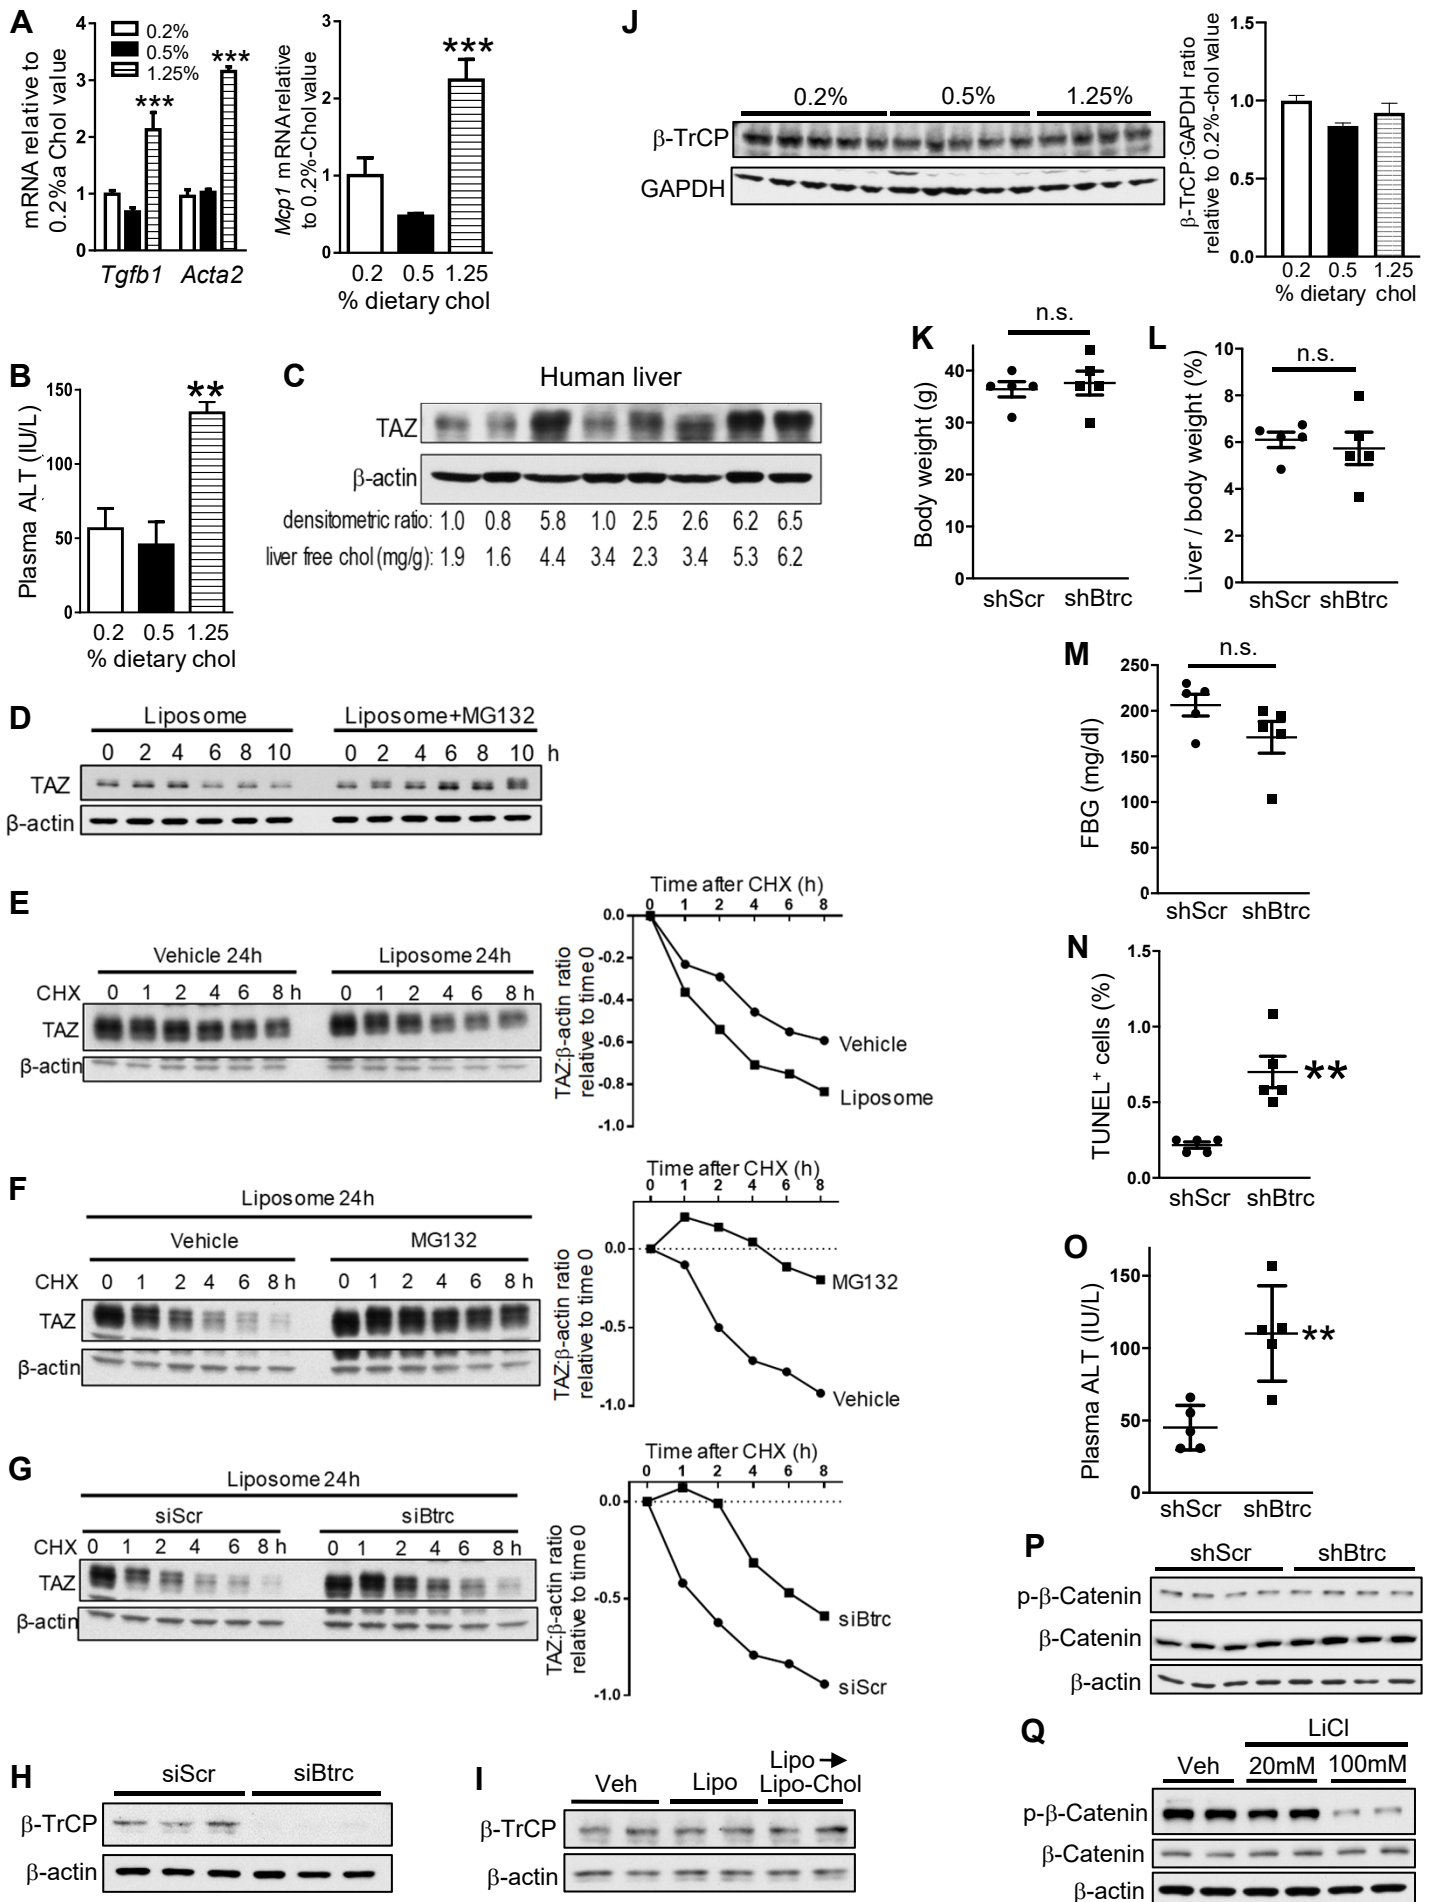

**Figure S1. Related to Figure 1. TAZ in Human NASH Liver, Evidence that Cholesterol Stabilizes TAZ Against Proteasomal Degradation, and Further Characterization of NAFLD Mice Treated with AAV8-H1-shBtrc.**

(A-B) The following parameters were measured in mice fed the NAFLD diet containing 0.2%, 0.5%, and 1.25% cholesterol for 16 weeks (n = 5 mice/group; means  $\pm$  SEM; \*\*p < 0.01, \*\*\*p < 0.001):

(A) Liver *Tgfb1*, *Acta2* ( $\alpha$ -SMA), and *Mcp1* mRNAs.

(B) Plasma ALT.

(C) TAZ immunoblot of human liver sections from the 8 subjects in Figure 1F, with densitometric ratio of TAZ: $\beta$ -actin and liver free cholesterol content shown below each lane.

(D) TAZ immunoblot of AML12 cells treated for 0-10 h with liposomes  $\pm$  10 nM MG132.

(E) TAZ immunoblot, with quantification, of AML12 cells that were incubated for 24 h with vehicle or liposomes, with 10 ng/ml cycloheximide (CHX) included for 0-8 h during the end of this period.

(F) TAZ immunoblot, with quantification, of AML12 cells that were incubated for 24 h with vehicle or liposomes, with 10 ng/ml cycloheximide (CHX)  $\pm$  10 nM MG132 included for 0-8 h during the end of this period.

(G) TAZ immunoblot of siSrc- or siBtrc-transfected AML12 cells that were incubated for 24 h with liposomes, with 10 ng/ml cycloheximide (CHX) included for 0-8 h during the end of this period.

(H)  $\beta$ -TrCP immunoblot of AML12 cells transfected with siScr or siBtrc.

(I)  $\beta$ -TrCP immunoblot of AML12 cells that were incubated for 24 h with vehicle or liposomes, or 16 h with liposomes followed by 8 h with Lipo-Chol.

(J)  $\beta$ -TrCP immunoblot of liver extracts, with quantification, from mice fed 16 weeks with the NAFLD diet containing 0.2%, 0.5%, and 1.25% cholesterol.

(K-P) The following parameters were measured in mice fed the NAFLD diet containing 0.2% cholesterol for 16 weeks, with AAV8-H1-shBtrc or AAV8-H1-shScr injected at the 8-week time point (n = 5 mice/group; means  $\pm$  SEM; \*\*p < 0.01; n.s., non-significant):

(K) Body weight.

(L) Liver weight as a percentage of body weight.

(M) Fasting plasma glucose.

(N) TUNEL<sup>+</sup> cells in the liver.

(O) Plasma ALT.

(P) Immunoblots of phospho-Ser<sup>31,37</sup>Thr<sup>41</sup> and total  $\beta$ -catenin of liver extracts.

(Q) Immunoblots of phospho-Ser<sup>31,37</sup>Thr<sup>41</sup> and total  $\beta$ -catenin of AML12 cells that were incubated for 4 h with vehicle or 20-100 mM LiCl.

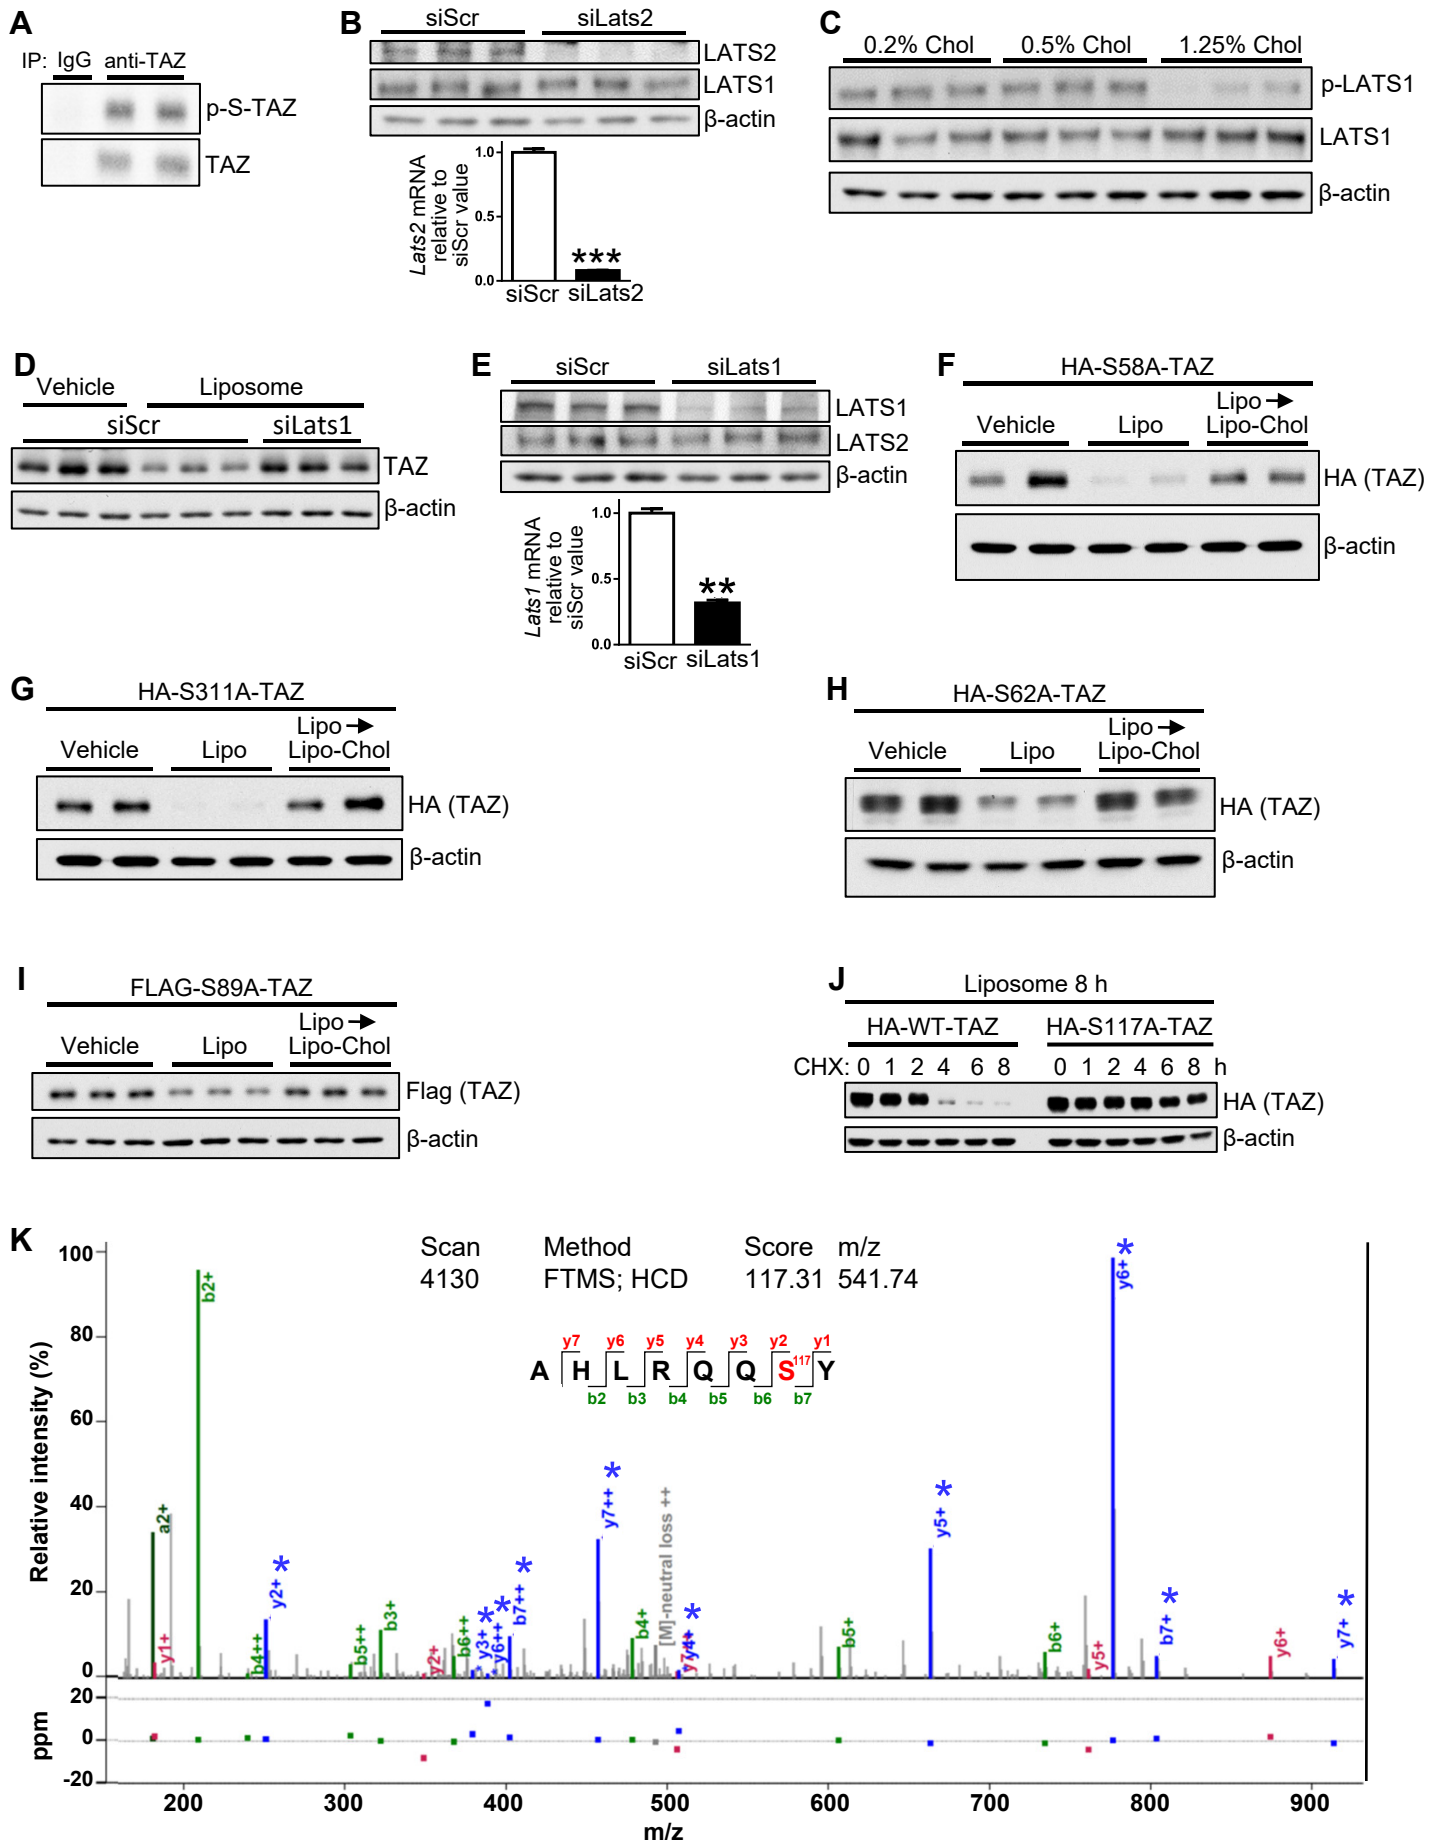

**Figure S2. Related to Figure 2. Effect of Individual Serine-Alanine Mutations on Cholesterol-Mediated Increase in TAZ, and Mass Spectroscopy Evidence that TAZ is Phosphorylated on S117.**

(A) Phospho-serine and total TAZ immunoblots in TAZ immunoprecipitates of AML12 cell extracts.

(B) LATS1 and LATS2 immunoblots and *Lats2* mRNA of siScr- or siLats2-transfected AML12 cells ( $n = 4$  biological replicates; values shown are means  $\pm$  SEM; \*\*\* $p < 0.001$ ).

(C) Phospho- and total LATS1 immunoblots in liver extracts from mice fed 16 weeks with the NAFLD diet containing 0.2%, 0.5%, or 1.25% cholesterol.

(D) TAZ immunoblot of siScr- or siLats1-transfected AML12 cells that were incubated for 24 h with vehicle or liposomes.

(E) LATS1 and LATS2 immunoblots and *Lats1* mRNA ( $n = 4$  biological replicates; means  $\pm$  SEM; \*\* $p < 0.01$ ).

(F-I) HA- or FLAG-TAZ immunoblots of AML12 cells transfected with the indicated mutant TAZ constructs and then incubated for 24 h with vehicle, or liposomes for 16 h and then Lipo-Chol for 8 h.

(J) HA-TAZ immunoblot of AML12 cells transfected with HA-WT-human TAZ or HA-S117A-human TAZ and then incubated for 8 h, with 10 ng/ml cycloheximide (CHX) included for the indicated times during this period.

(K) LC-MS/MS spectrum analysis of TAZ peptides from HepG2 cells that had been incubated for 4 h with 10 nM MG132 and liposomes. The analysis identified phosphopeptide AHLRQQS<sup>117</sup>(P)Y, whose sequence is shown with y and b ions indicated and with the phosphorylated serine (S117) indicated in red. The numbers paired with each ion identification, e.g., b3 and y5, indicate the number of amino acids present on N-terminal fragments for b ions and C-terminal fragments for y ions. Peaks in the spectrum that are green correspond to matched b ions and peaks that are red correspond to matched y ions, with good sequence coverage of spectral lines for the y2, y3, y4, y5, y6, y7, and b7 fragments, noted by the blue asterisks.

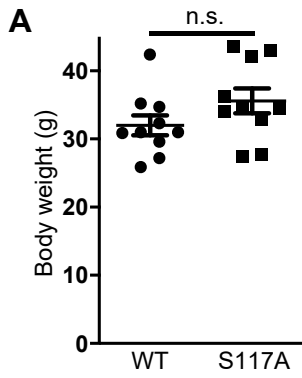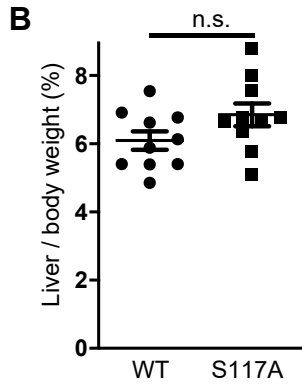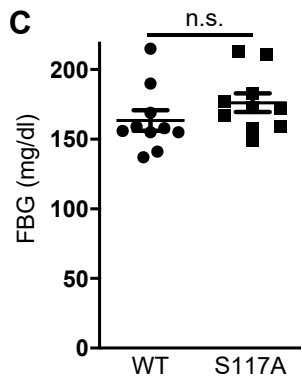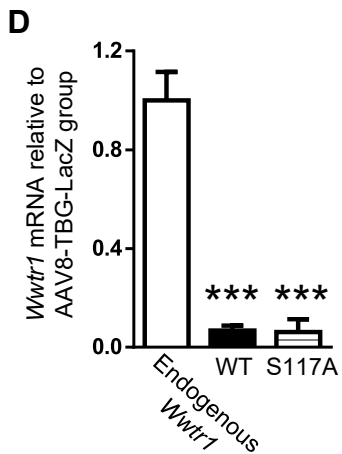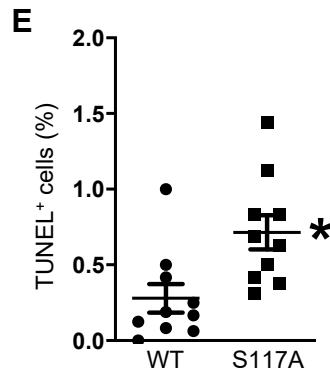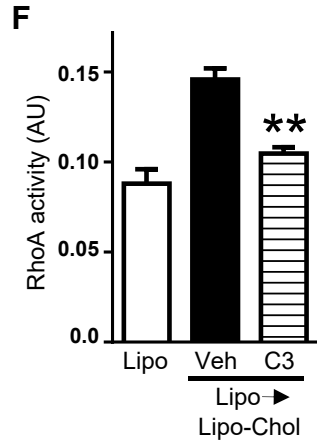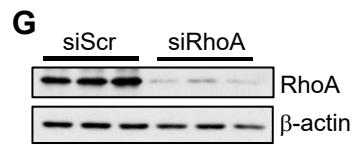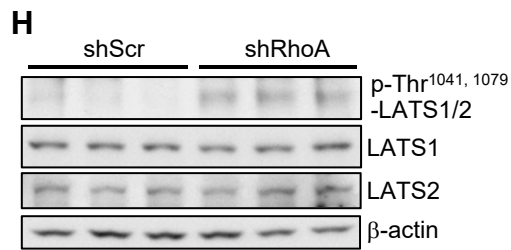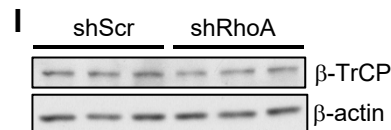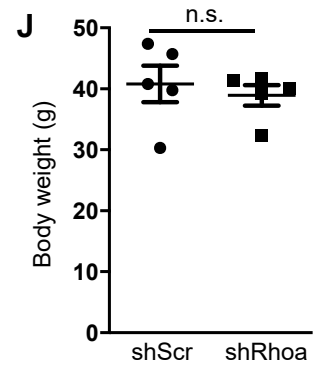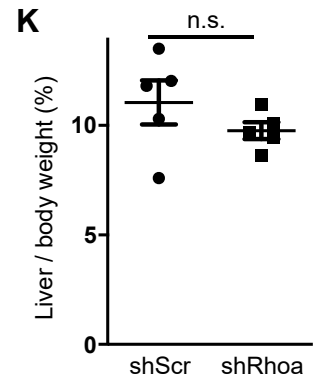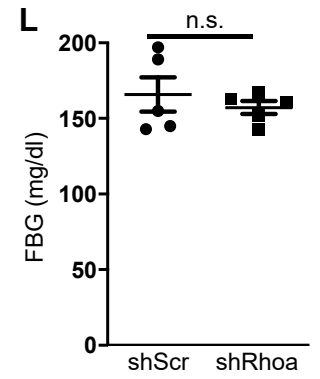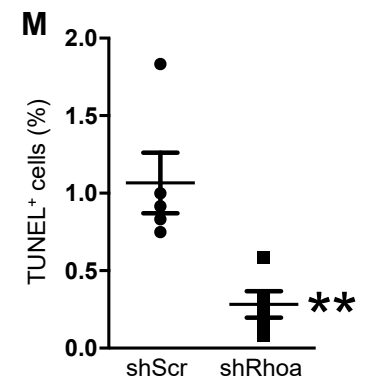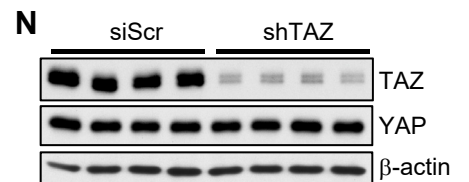

**Figure S3. Related to Figures 2 and 3. Further Characterization of NASH Mice Transduced with AAV8-TBG-S117A-TAZ or with AAV8-H1-shRhoa.**

(A-E) The following parameters were measured in *Wwtr1<sup>fl/fl</sup>* mice fed the NAFLD diet containing 0.2% cholesterol for 16 weeks, with AAV8-TBG-Cre plus either AAV8-TBG-HA-WT-hTAZ (WT) or AAV8-TBG-HA-S117A-hTAZ (S117A) injected at the 8-week time point (n = 10 mice/group; means ± SEM; \*p < 0.05; \*\*\*p < 0.001; n.s., non-significant):

(A) Body weight.

(B) Liver weight as a percentage of body weight.

(C) Fasting plasma glucose.

(D) Liver *Wwtr1* mRNA in *Wwtr1<sup>fl/fl</sup>* mice treated with AAV8-TBG-LacZ instead of AAV8-TBG-Cre and without AAV8-TBG-hTAZ ("Endogenous *Wwtr1*").

(E) TUNEL<sup>+</sup> cells in the liver.

(F) RhoA activity of AML12 cells that were incubated for 24 h with liposomes (Lipo) or for 16 h with liposomes and then 8 h with Lipo-Chol ± 1 µg/ml C3 transferase Rho inhibitor (C3) included during the last 4 h (n = 4 biological replicates; means ± SEM; \*\*p < 0.01 versus Veh).

(G) RhoA immunoblot of AML12 cells that were transfected with siScr or siRhoa.

(H-L) The following parameters were assayed in mice fed the NASH diet for 16 weeks, with AAV8-H1-shRhoa or AAV8-H1-shScr administered at the 8-week time point (n = 5 mice/group; values shown are means ± SEM; \*\*p < 0.01; n.s., non-significant):

(H) Liver phospho-Thr<sup>1041, 1079</sup>-LATS1/2, LATS1, and LATS2 immunoblots.

(I) Liver β-TrCP immunoblot.

(J) Body weight.

(K) Liver weight as a percentage of body weight.

(L) Fasting plasma glucose.

(M) TUNEL<sup>+</sup> cells in the liver.

(N) TAZ and YAP immunoblots in liver extracts from mice fed 16 weeks with the NASH diet, with AAV8-H1-shTAZ or AAV8-H1-shScr administered at the 8-week time point.

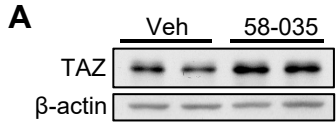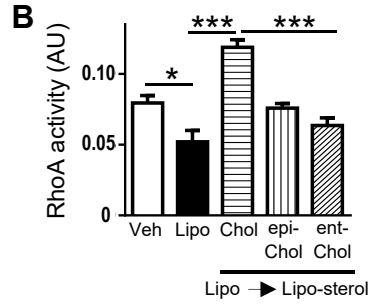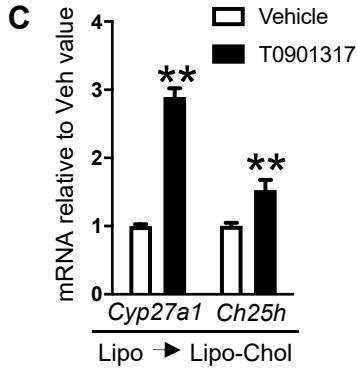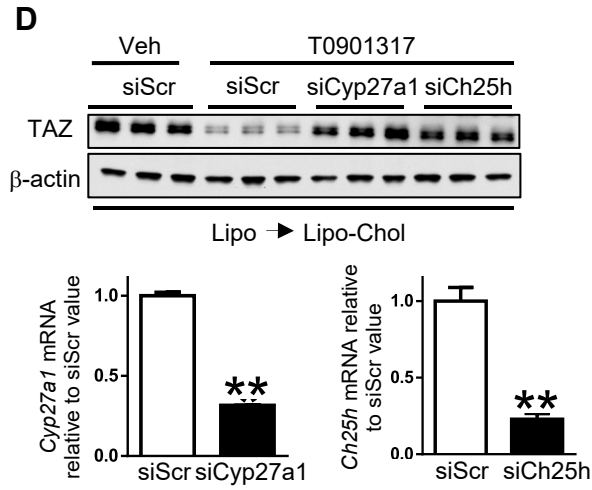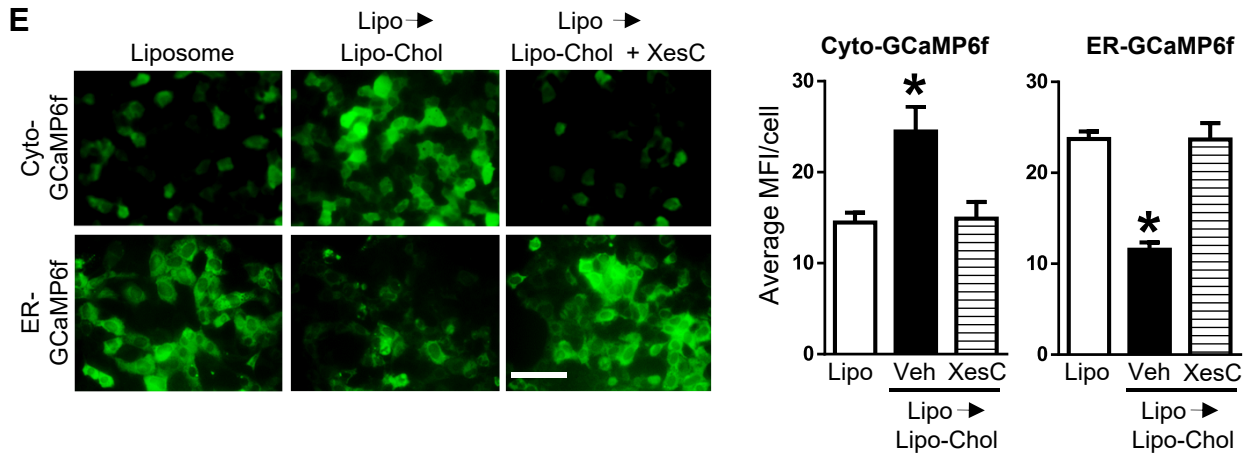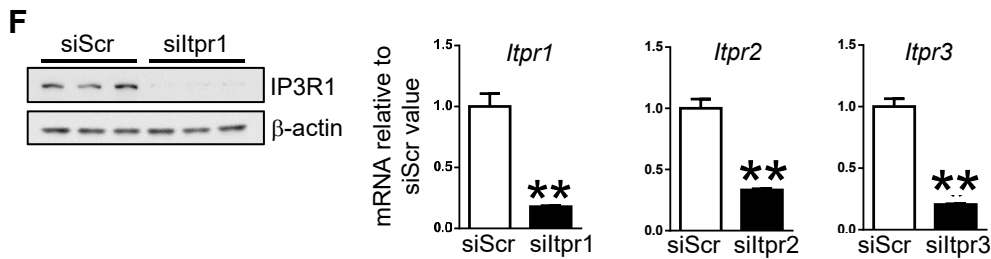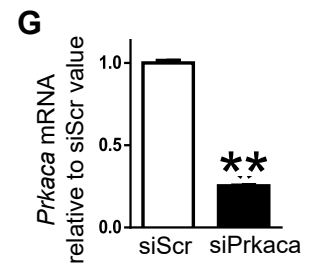

**Figure S4. Related to Figures 4 and 5. Cholesterol Specificity of the TAZ Pathway and IP3R-Mediated Calcium Changes.**

(A) TAZ immunoblot of AML12 cells that were incubated for 8 h with vehicle or 30  $\mu$ M of the ACAT inhibitor 58-035.

(B) RhoA activity of AML12 cells that were incubated for 18 h with vehicle or liposomes, or 16 h with liposomes and then 2 h with sterol-rich liposomes (Lipo  $\rightarrow$  Lipo-sterol) containing cholesterol (Chol), *epi*-cholesterol (*epi*-Chol), or *ent*-cholesterol (*ent*-Chol) ( $n = 4$  biological replicates; means  $\pm$  SEM; \* $p < 0.05$ , \*\*\* $p < 0.001$ ).

(C) *Cyp27a1* and *Ch25h* mRNAs in AML12 cells that were incubated for 16 h with liposomes and then 24 h with Lipo-Chol  $\pm$  20  $\mu$ M T0901317 ( $n = 4$  biological replicates; means  $\pm$  SEM; \*\* $p < 0.01$ ).

(D) TAZ immunoblot and *Cyp27a1*, and *Ch25h* mRNA levels of AML12 cells were transfected with siScr, siCyp27a1, or siCh25h and then incubated for 16 h with liposomes followed by 24 h with Lipo-Chol  $\pm$  20  $\mu$ M T0901317 ( $n = 4$  biological replicates; means  $\pm$  SEM; \*\* $p < 0.01$ ).

(E) Images and mean fluorescence intensity (MFI) per cell of AML12 cells transduced with cyto-GCaMP6f or ER-GCaMP6f and then incubated for 16.5 h with liposomes or 16 h with liposomes and then 30 minutes with Lipo-Chol  $\pm$  2  $\mu$ M xestospongine C (XesC) ( $n = 3$  biological replicates; means  $\pm$  SEM; \* $p < 0.05$  versus other groups). Scale bar, 100  $\mu$ m.

(F) IP3R1 immunoblot and *Itpr1*, *Itpr2*, and *Itpr3* mRNA levels of AML12 cells that were transfected with siScr, siltpr1, siltpr2, or siltpr3 ( $n = 4$  biological replicates; means  $\pm$  SEM; \*\* $p < 0.01$ ).

(G) *Prkaca* mRNA in AML12 cells that were transfected with siScr or siPrkaca ( $n = 4$  biological replicates; means  $\pm$  SEM; \*\* $p < 0.01$ ).



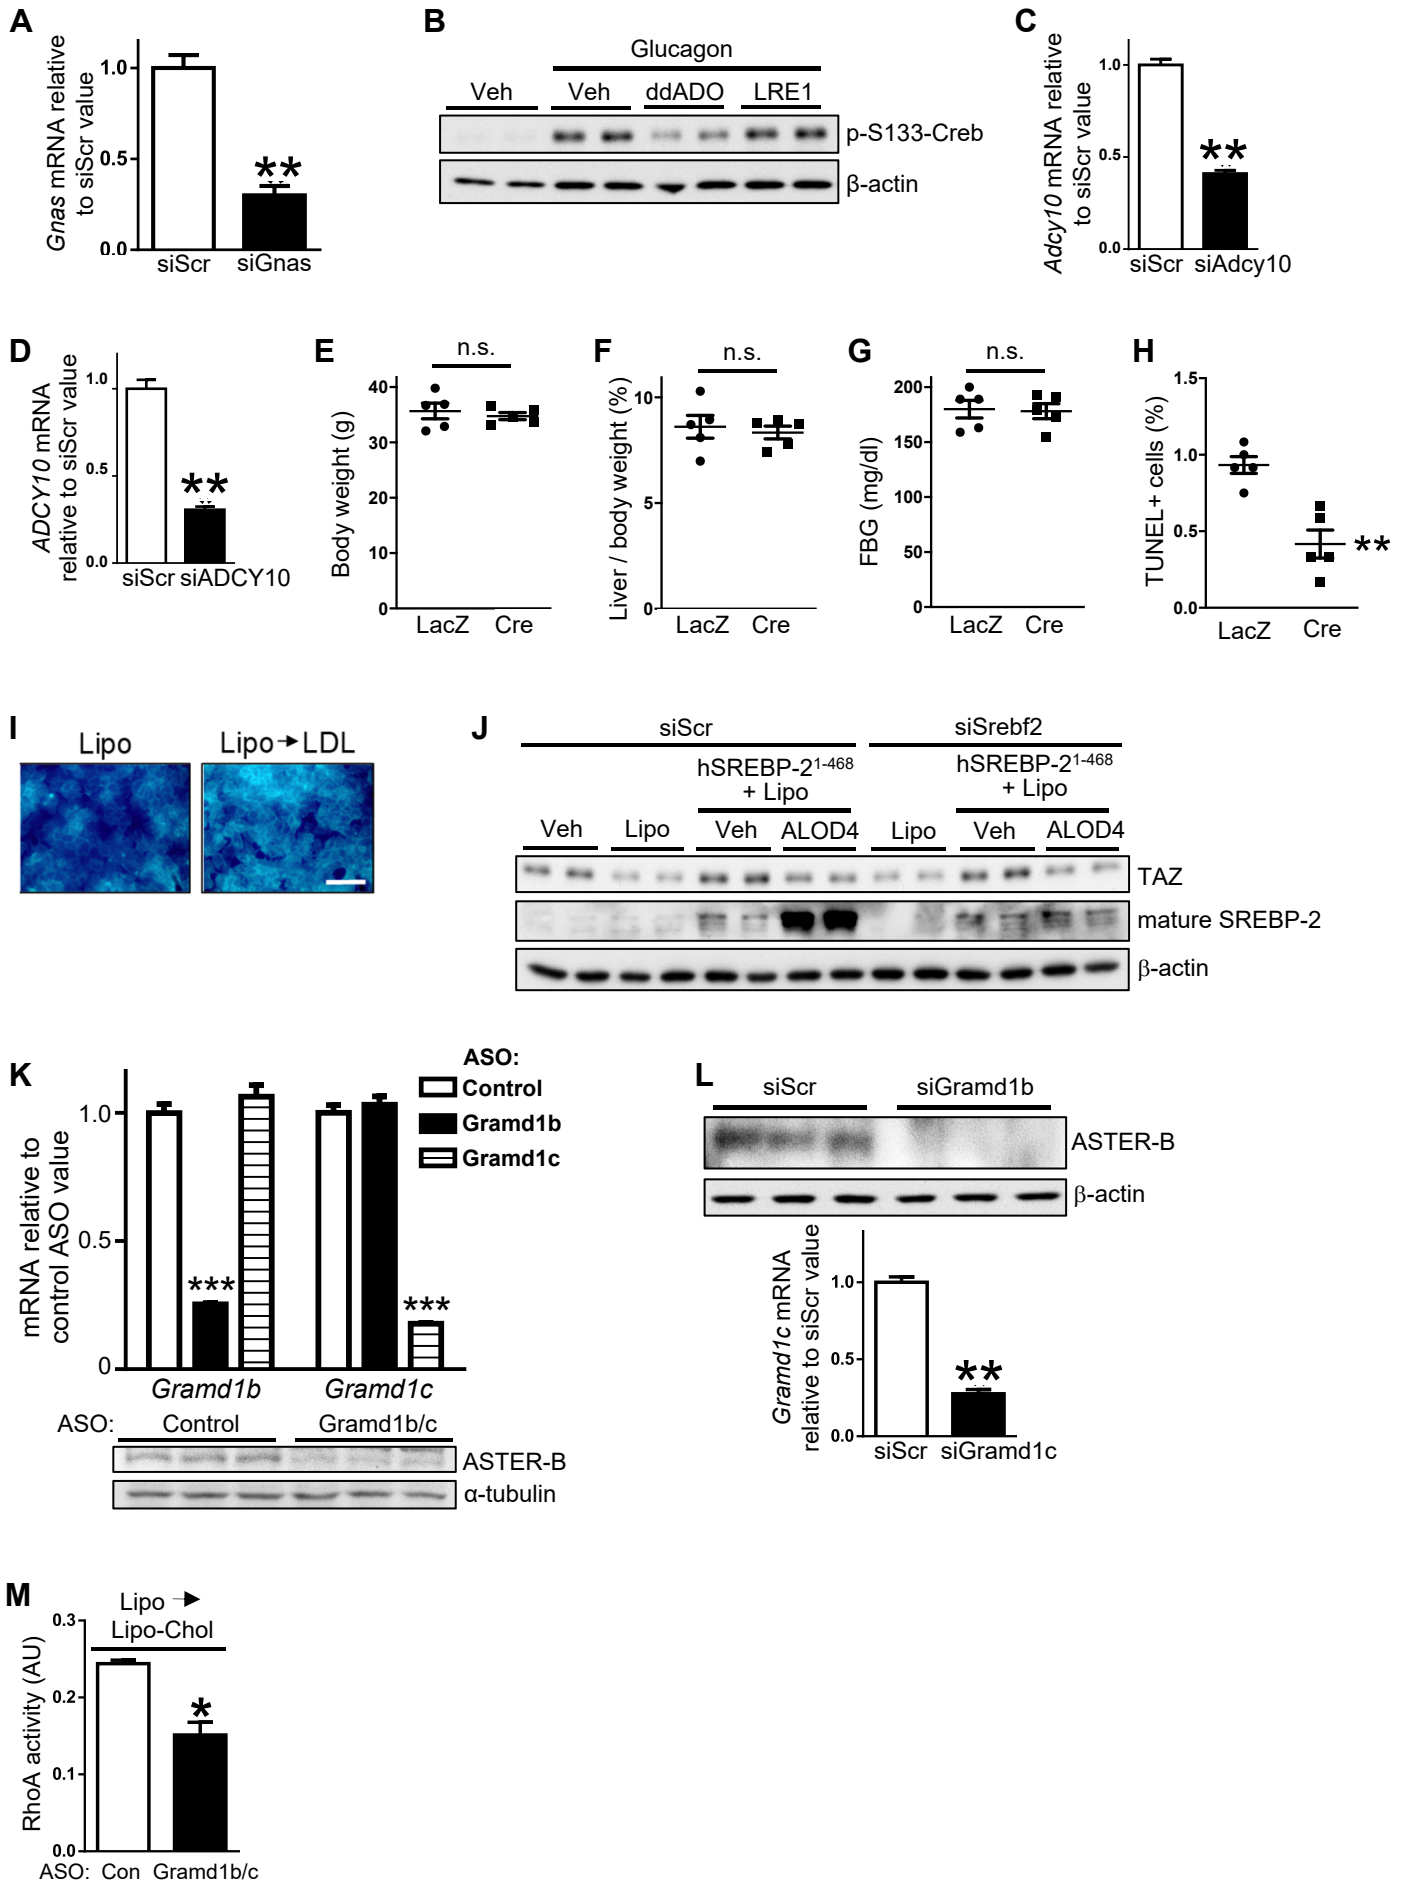

**Figure S5. Related to Figure 5. Additional Data Related to Adenylyl Cyclase and Gramd1b/c.**

(A) *Gnas* mRNA in AML12 cells were transfected with siScr or siGnas ( $n = 4$  biological replicates; means  $\pm$  SEM;  $**p < 0.01$ ).

(B) Phospho-S133-Creb immunoblot of primary mouse hepatocytes that were incubated for 30 min with vehicle or 200 nM glucagon  $\pm$  10  $\mu$ M 2',5'-dideoxyadenosine (ddAdo) or 30  $\mu$ M LRE1.

(C) *Adcy10* mRNA of AML12 cells that were transfected with siScr or siAdcy10 ( $n = 4$  biological replicates; means  $\pm$  SEM;  $**p < 0.01$ ).

(D) *ADCY10* mRNA of primary human hepatocytes that were transfected with siScr or siADCY10 ( $n = 6$  biological replicates; means  $\pm$  SEM;  $**p < 0.01$ ).

(E-H) The following parameters were assayed in *Adcy10<sup>fl/fl</sup>* mice fed the NASH diet for 16 weeks, with AAV8-TBG-Cre or AAV8-TBG-LacZ administered at the 8-week time point ( $n = 5$  mice/group; means  $\pm$  SEM,  $**p < 0.01$ , n.s., non-significant):

(E) Body weight.

(F) Liver weight as a percentage of body weight.

(G) Fasting plasma glucose.

(H) TUNEL<sup>+</sup> cells in the liver.

(I) Filipin staining of AML12 cells that were incubated for 24 h with liposomes or 24 h with liposomes and then 8 h with 100  $\mu$ g/ml LDL. Scale bar, 100  $\mu$ m.

(J) TAZ and mature SREBP-2 immunoblots of AML12 cells transfected with siScr or siSrebf2 targeting endogenous SREBP-2 and treated as follows: incubated for 24 h with vehicle or liposomes; or transfected with human SREBP-2(1-468) and then incubated for 24 h with liposomes  $\pm$  10  $\mu$ M ALOD4 included during the last 4 h.

(K) *Grand1b* and *Grand1c* mRNA levels and ASTER-B immunoblot of AML12 cells were transfected with control ASO or ASO targeting *Grand1b* or *Grand1c* ( $n = 4$  biological replicates; means  $\pm$  SEM;  $***p < 0.001$  versus other groups).

(L) ASTER-B immunoblot and *Grand1c* mRNA level of AML12 cells were transfected with siScr or siGrand1b ( $n = 4$  biological replicates; means  $\pm$  SEM;  $**p < 0.01$ ).

(M) RhoA activity of AML12 cells that were treated with control ASO or ASO targeting *Grand1b* and *Grand1c* and then incubated for 24 h with liposomes followed by 2 h with Lipo-Chol ( $n = 4$  biological replicates; means  $\pm$  SEM;  $*p < 0.05$ ).

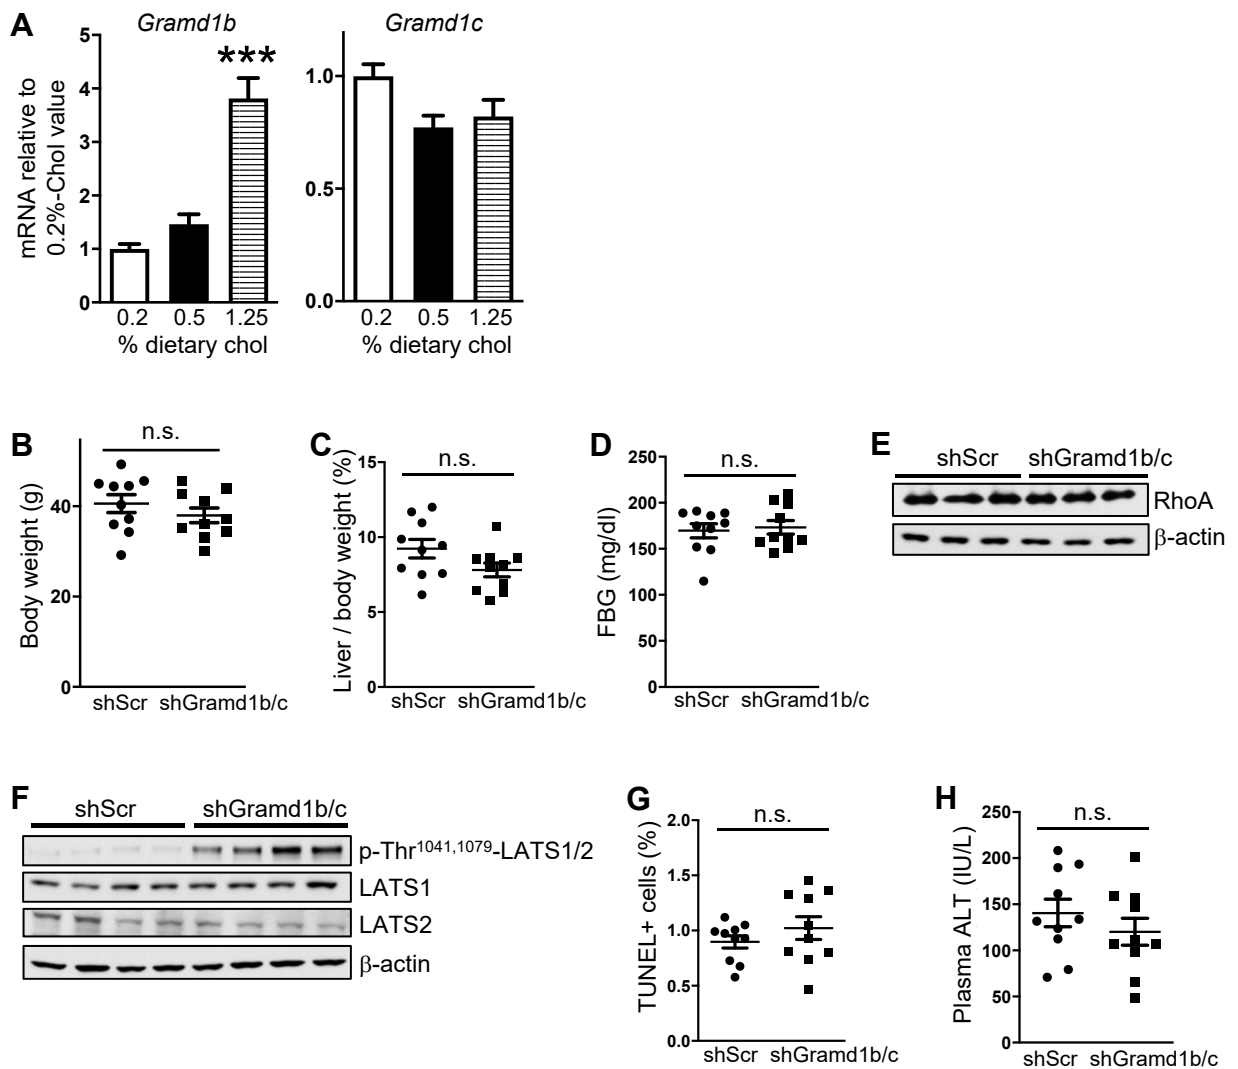

**Figure S6. Related to Figures 6 and 7. Further Characterization of NASH Mice Treated with AAV8-H1-shGramd1b/c.**

(A) *Gramd1b* and *Gramd1c* mRNA levels of liver extracts from mice fed 16 weeks with the NAFLD diet containing 0.2%, 0.5%, and 1.25% cholesterol (n = 5; means ± SEM; \*\*\*p < 0.001).

(B-H) The following parameters were assayed in mice fed the NASH diet for 16 weeks, with AAV8-H1-shGramd1b/c or AAV8-H1-shSrc administered at the 8-week time point (n = 10 mice/group; means ± SEM; n.s., non-significant):

(B) Body weight.

(C) Liver weight as a percentage of body weight.

(D) Fasting plasma glucose.

(E) Liver RhoA immunoblot.

(F) Liver phospho-Thr<sup>1041,1079</sup>-LATS1/2, LATS1, and LATS2 immunoblots.

(G) TUNEL<sup>+</sup> cells in the liver.

(H) Plasma ALT.

**Table S1 (related to Figures 1F and 3F). Pathology of human NASH liver samples.**

| <b>ID</b> | <b>Age</b> | <b>Gender</b> | <b>Pathological diagnoses</b>                                                                                                                                                                                                                                                         |
|-----------|------------|---------------|---------------------------------------------------------------------------------------------------------------------------------------------------------------------------------------------------------------------------------------------------------------------------------------|
| 1         | 68         | Male          | Non-alcoholic steatohepatitis; cirrhosis, mixed macronodular and micronodular type. Minimal inflammatory activity, with minimal or no ongoing steatosis. No evidence of hepatocyte dysplasia or malignancy.                                                                           |
| 2         | 56         | Female        | Type 2 Diabetes. Obesity. Advanced chronic liver disease (stage 4: "cirrhosis"). Marked fibrosis throughout the entire liver. The residual hepatocellular parenchyma shows abundant well-formed Mallory hyaline, consistent with advanced chronic liver disease from steatohepatitis. |
| 3         | 53         | Male          | NASH. Cirrhosis. Mild steatosis and focal active steatohepatitis. Focal Mallory hyaline is identified.                                                                                                                                                                                |
| 4         | 67         | Female        | Cirrhosis, NASH. Active steatohepatitis, grade 2 of 3.                                                                                                                                                                                                                                |
| 5         | 64         | Female        | NASH. Cirrhosis with steatohepatitis and moderate macrovesicular steatosis.                                                                                                                                                                                                           |
| 6         | 62         | Female        | Fatty liver. Cirrhosis. Cirrhosis with moderate macrovesicular steatosis (35%) and focal steatohepatitis, consistent with fatty liver disease.                                                                                                                                        |
| 7         | 43         | Female        | Fatty liver. Cirrhosis with focal steatosis and mild activity.                                                                                                                                                                                                                        |
| 8         | 57         | Female        | NASH cirrhosis                                                                                                                                                                                                                                                                        |

**Table S2 (related to Figure 2 and Figure S2). Primers used for *WWTR1* mutagenesis.**

| Primers | 5'- Sequence -3'                    |
|---------|-------------------------------------|
| S58A F  | CCTGATgcgGGCTCGCACTCGC              |
| S58A R  | CTCCTTAAAG AAAGACTCCG GCAGGATCTT CT |
| S62A F  | TCGCACgcgCGCCAGTCCAG                |
| S62A R  | GCCCGAATCA GGCTCCTTAA AGAAAGACTC C  |
| S89A F  | TCGCACgcgTCGCCCGCGTCC               |
| S89A R  | GCGGACATGC TGGGCACCC                |
| S117A F | CAGCAGgccTACGACGTGACCGACG           |
| S117A R | GCGGAGGTGC GCGTGCTGC                |
| S311A F | GAGCAGgccACTGACAGTGGCCTG            |
| S311A R | CCTCGAATGA TATGGCCCTC CATTGAGGAA AG |

Note: lower case letters indicate the mutated nucleotide based on the sequence of WT human *WWTR1* mRNA.

**Table S3 (related to all figures). siRNA and shRNA sequences used in this study.**

| <b>Target Gene</b>              | <b>siRNA or shRNA</b> | <b>siRNA Sense Sequences (5' to 3')</b>          |
|---------------------------------|-----------------------|--------------------------------------------------|
| <i>Btrc</i> ( $\beta$ -TrCP)    | siRNA                 | rGrArGrCrUrArArArUrUrGrUrGrArUrArCrCrUrUrCrCrUGT |
| <i>Btrc</i> ( $\beta$ -TrCP)    | shRNA                 | GCGACATAGTTTACAGAGAAT                            |
| <i>Lats2</i>                    | siRNA                 | rArArGrArUrUrGrUrArUrUrArUrGrGrUrArArArGrGAA     |
| <i>Rhoa</i>                     | siRNA                 | rCrUrArCrCrArGrUrArUrUrUrArGrArArGrCrCrArArCrCAC |
| <i>Rhoa</i>                     | shRNA                 | GTCAAGCATTCTGTCCAAAT                             |
| <i>Itpr1</i> (IP3R1)            | siRNA                 | rGrUrUrUrCrArUrCrUrGrCrArArGrCrUrArArUrArArACA   |
| <i>Itpr2</i> (IP3R2)            | siRNA                 | rGrCrUrUrUrGrArArGrUrArUrUrArCrGrCrCrArArCrCrACA |
| <i>Itpr3</i> (IP3R3)            | siRNA                 | rGrUrCrCrUrGrCrUrUrArGrUrArCrCrGrUrUrGrArArGrAGA |
| <i>Prkaca</i> (PKA)             | siRNA                 | rGrGrArUrCrArGrUrUrUrGrArUrArGrArArUrCrArArGrACC |
| <i>Gramd1b</i> (ASTER-B)        | siRNA                 | rGrGrCrGrUrUrUrCrUrCrUrGrArUrArUrCrArUrCrUrUrCCA |
| <i>Gramd1b</i> (ASTER-B)        | shRNA                 | GATGAAGGACTCGCTTATCAA                            |
| <i>Gramd1c</i> (ASTER-C)        | siRNA                 | rCrArArGrUrCrArCrUrGrGrArCrUrUrGrArArUrArArGrAAT |
| <i>Gramd1c</i> (ASTER-C)        | shRNA                 | GGGAAAGAGATGAGAAGTTCT                            |
| <i>Adcy10</i> (sAC)             | siRNA                 | rGrArArArUrCrUrCrUrGrArCrGrArArUrGrArArGrArUrUCT |
| <i>ADCY10</i> (human sAC)       | siRNA                 | rCrArArUrCrArUrUrUrCrUrArArCrArUrGrUrCrArArArGAA |
| <i>Cyp27a1</i>                  | siRNA                 | rGrUrUrCrCrArGrArArCrUrCrArGrUrCrUrArUrArUrCrACT |
| <i>Ch25h</i>                    | siRNA                 | rArCrCrUrGrArUrUrUrCrUrGrArCrUrCrUrUrUrArArUAA   |
| <i>Gnas</i>                     | siRNA                 | rCrUrUrCrCrCrArCrCrUrGrArArUrUrCrUrArUrGrArGrCAT |
| <i>Srebp2</i> ( <i>Srebf2</i> ) | siRNA                 | rArGrGrCrArArGrArCrUrGrArUrUrGrUrUrCrUrGrArGrCTG |

**Table S4 (Related to all figures). Primers used for qPCR.**

| <b>Primers</b>               | <b>Organism</b> | <b>5'- Sequence -3'</b>    |
|------------------------------|-----------------|----------------------------|
| <i>Hprt</i> F                | mouse           | TCAGTCAACGGGGGACATAAA      |
| <i>Hprt</i> R                | mouse           | GGGGCTGTACTGCTTAACCAG      |
| <i>HPRT</i> F                | human           | CCTGGCGTCGTGATTAGTGAT      |
| <i>HPRT</i> R                | human           | AGACGTTTCAGTCCTGTCCATAA    |
| <i>Taz (Wwtr1)</i> F         | mouse           | CATGGCGGAAAAAGATCCTCC      |
| <i>Taz (Wwtr1)</i> R         | mouse           | GTCGGTCACGTCATAGGACTG      |
| <i>WWTR1</i> F               | human           | TCCCAGCCAAATCTCGTGATG      |
| <i>WWTR1</i> R               | human           | AGCGCATTGGGCATACTCAT       |
| <i>Tgfb1</i> F               | mouse           | CTCCCGTGGCTTCTAGTGC        |
| <i>Tgfb1</i> R               | mouse           | GCCTTAGTTTTGGACAGGATCTG    |
| <i>Acta2</i> F               | mouse           | ATGCTCCCAGGGCTGTTTTCCCAT   |
| <i>Acta2</i> R               | mouse           | GTGGTGCCAGATCTTTTCCATGTCC  |
| <i>Btrc</i> F                | mouse           | AAGACTGTAATAATGGCGAACCC    |
| <i>Btrc</i> R                | mouse           | TCTCTTGGTTTATGCAAAGCCTG    |
| <i>Rhoa</i> F                | mouse           | AGCTTGTGGTAAGACATGCTTG     |
| <i>Rhoa</i> R                | mouse           | GTGTCCCATAAAGCCAACCTCTAC   |
| <i>Col1a1</i> F              | mouse           | GCTCCTCTTAGGGGCCACT        |
| <i>Col1a1</i> R              | mouse           | CCACGTCTCACCATTGGGG        |
| <i>Col1a2</i> F              | mouse           | GTAACCTCGTGCCTAGCAACA      |
| <i>Col1a2</i> R              | mouse           | CCTTTGTCAGAATACTGAGCAGC    |
| <i>Col3a1</i> F              | mouse           | CTGTAACATGGAACTGGGGAAA     |
| <i>Col3a1</i> R              | mouse           | CCATAGCTGAACTGAAAACCACC    |
| <i>Dpt</i> F                 | mouse           | TGGATGGGTGAATCTTAACCGC     |
| <i>Dpt</i> R                 | mouse           | TCAGAGCCTTCCTTCTTGCTA      |
| <i>Adgre1 (F4/80,Emr1)</i> F | mouse           | ACCACAATACCTACATGCACC      |
| <i>Adgre1 (F4/80,Emr1)</i> R | mouse           | AAGCAGGCGAGGAAAAGATAG      |
| <i>Tnfa</i> F                | mouse           | CTTCTGTCTACTGAACTTCGGG     |
| <i>Tnfa</i> R                | mouse           | CAGGCTTGTCACTCGAATTTTG     |
| <i>Mcp1</i> F                | mouse           | TTAAAAACCTGGATCGGAACCAA    |
| <i>Mcp1</i> R                | mouse           | GCATTAGCTTCAGATTTACGGGT    |
| <i>Ihh</i> F                 | mouse           | CTCTTGCCACAAGCAGTTCA       |
| <i>Ihh</i> R                 | mouse           | CCGTGTTCTCCTCGTCCTT        |
| <i>Spp1 (Opn)</i> F          | mouse           | CTGACCCATCTCAGAAGCAGAATCT  |
| <i>Spp1 (Opn)</i> R          | mouse           | TCCATGTGGTCATGGCTTTTCATTGG |
| <i>Timp1</i> F               | mouse           | CTCAAAGACCTATAGTGCTGGC     |
| <i>Timp1</i> R               | mouse           | CAAAGTGACGGCTCTGGTAG       |
| <i>Last1</i> F               | mouse           | TGGTGACTCTGGGGATAAAGAA     |
| <i>Lats1</i> R               | mouse           | GGGAGTAACTCTGAATCCGAGAC    |
| <i>Lats2</i> F               | mouse           | GGACCCAGGAATGAGCAG         |

|                  |       |                         |
|------------------|-------|-------------------------|
| <i>Lats2 R</i>   | mouse | CCCTCGTAGTTTGCACCACC    |
| <i>Itpr1 F</i>   | mouse | CGTTTTGAGTTTGAAGGCGTTT  |
| <i>Itpr1 R</i>   | mouse | CATCTTGCGCCAATTCCCG     |
| <i>Itpr2 F</i>   | mouse | CCTCGCCTACCACATCACC     |
| <i>Itpr2 R</i>   | mouse | TCACCACTCTCACTATGTCTGT  |
| <i>Itpr3 F</i>   | mouse | GGGCGCAGAACAACGAGAT     |
| <i>Itpr3 R</i>   | mouse | GAAGTTTTGCAGGTCACGGTT   |
| <i>Gnas F</i>    | mouse | CAGAGCCTCCATTGGGGTC     |
| <i>Gnas R</i>    | mouse | GCTTCTCGCTCAACTGGGG     |
| <i>Cyp27a1 F</i> | mouse | CCAGGCACAGGAGAGTACG     |
| <i>Cyp27a1 R</i> | mouse | GGGCAAGTGCAGCACATAG     |
| <i>Ch25h F</i>   | mouse | TGCTACAACGGTTCGGAGC     |
| <i>Ch25h R</i>   | mouse | AGAAGCCCACGTAAGTGATGAT  |
| <i>Prkaca F</i>  | mouse | AGATCGTCCTGACCTTTGAGT   |
| <i>Prkaca R</i>  | mouse | GGCAAACCGAAGTCTGTCCAC   |
| <i>Gramd1b F</i> | mouse | ACACAATGGGCTACTGTGAGG   |
| <i>Gramd1b R</i> | mouse | GGCTTGGTCTCGATGCTACT    |
| <i>Gramd1c F</i> | mouse | AACAAAGATCAGGCCACCG     |
| <i>Gramd1c R</i> | mouse | AGTGAGCTCTTCAGCTGTTCC   |
| <i>Adcy10 F</i>  | mouse | TGCCAGTGGGATTGTCTTC     |
| <i>Adcy10 R</i>  | mouse | TGAGGCCCAAACACTGATAC    |
| <i>ADCY10 F</i>  | human | ACAAAGTGTACGACCTTCATGC  |
| <i>ADCY10 R</i>  | human | CGAAGCTCAGATAAATAGCCCTG |

*Hprt*, hypoxanthine guanine phosphoribosyl transferase; *Taz* (*Wwtr1*), WW domain containing transcription regulator 1; *Tgfb1*, transforming growth factor, beta 1; *Acta2*,  $\alpha$ -smooth muscle actin; *Btrc*, beta-transducin repeat containing protein; *Rhoa*, ras homolog family member A; *Col1a1*, collagen type I alpha 1; *Col1a2*, collagen type I alpha 2; *Col3a1*, collagen, type III, alpha 1; *Dpt*, dermatopontin; *Adgre1* (*F4/80*), adhesion G protein-coupled receptor E1; *Tnfa*, tumor necrosis factor- $\alpha$ ; *Mcp1*, monocyte chemoattractant protein-1; *lhh*, Indian hedgehog; *Spp1*, secreted phosphoprotein 1; *Timp1*, tissue inhibitor of metalloproteinase 1; *Lats1*, large tumor suppressor; *Lats2*, large tumor suppressor 2; *Itpr1*, inositol 1,4,5-trisphosphate receptor 1; *Itpr2*, inositol 1,4,5-trisphosphate receptor 2; *Itpr3*, inositol 1,4,5-trisphosphate receptor 3; *Gnas*, GNAS (guanine nucleotide binding protein, alpha stimulating) complex locus; *Cyp27a1*, cytochrome P450 family 27 subfamily a polypeptide 1; *Ch25h*, cholesterol 25-hydroxylase; *Prkaca*, protein kinase, cAMP dependent, catalytic, alpha; *Gramd1b*, GRAM domain containing 1B; *Gramd1c*, GRAM domain containing 1C; *Adcy10/ADCY10*, adenylate cyclase 10.
