# Supplementary material
Source: PubMed Central journal article supplement (PMC7313619)
Supplement: NIHMS1577153-supplement-Suppl_Figures.pdf [file NIHMS1577153-supplement-Suppl_Figures.pdf]

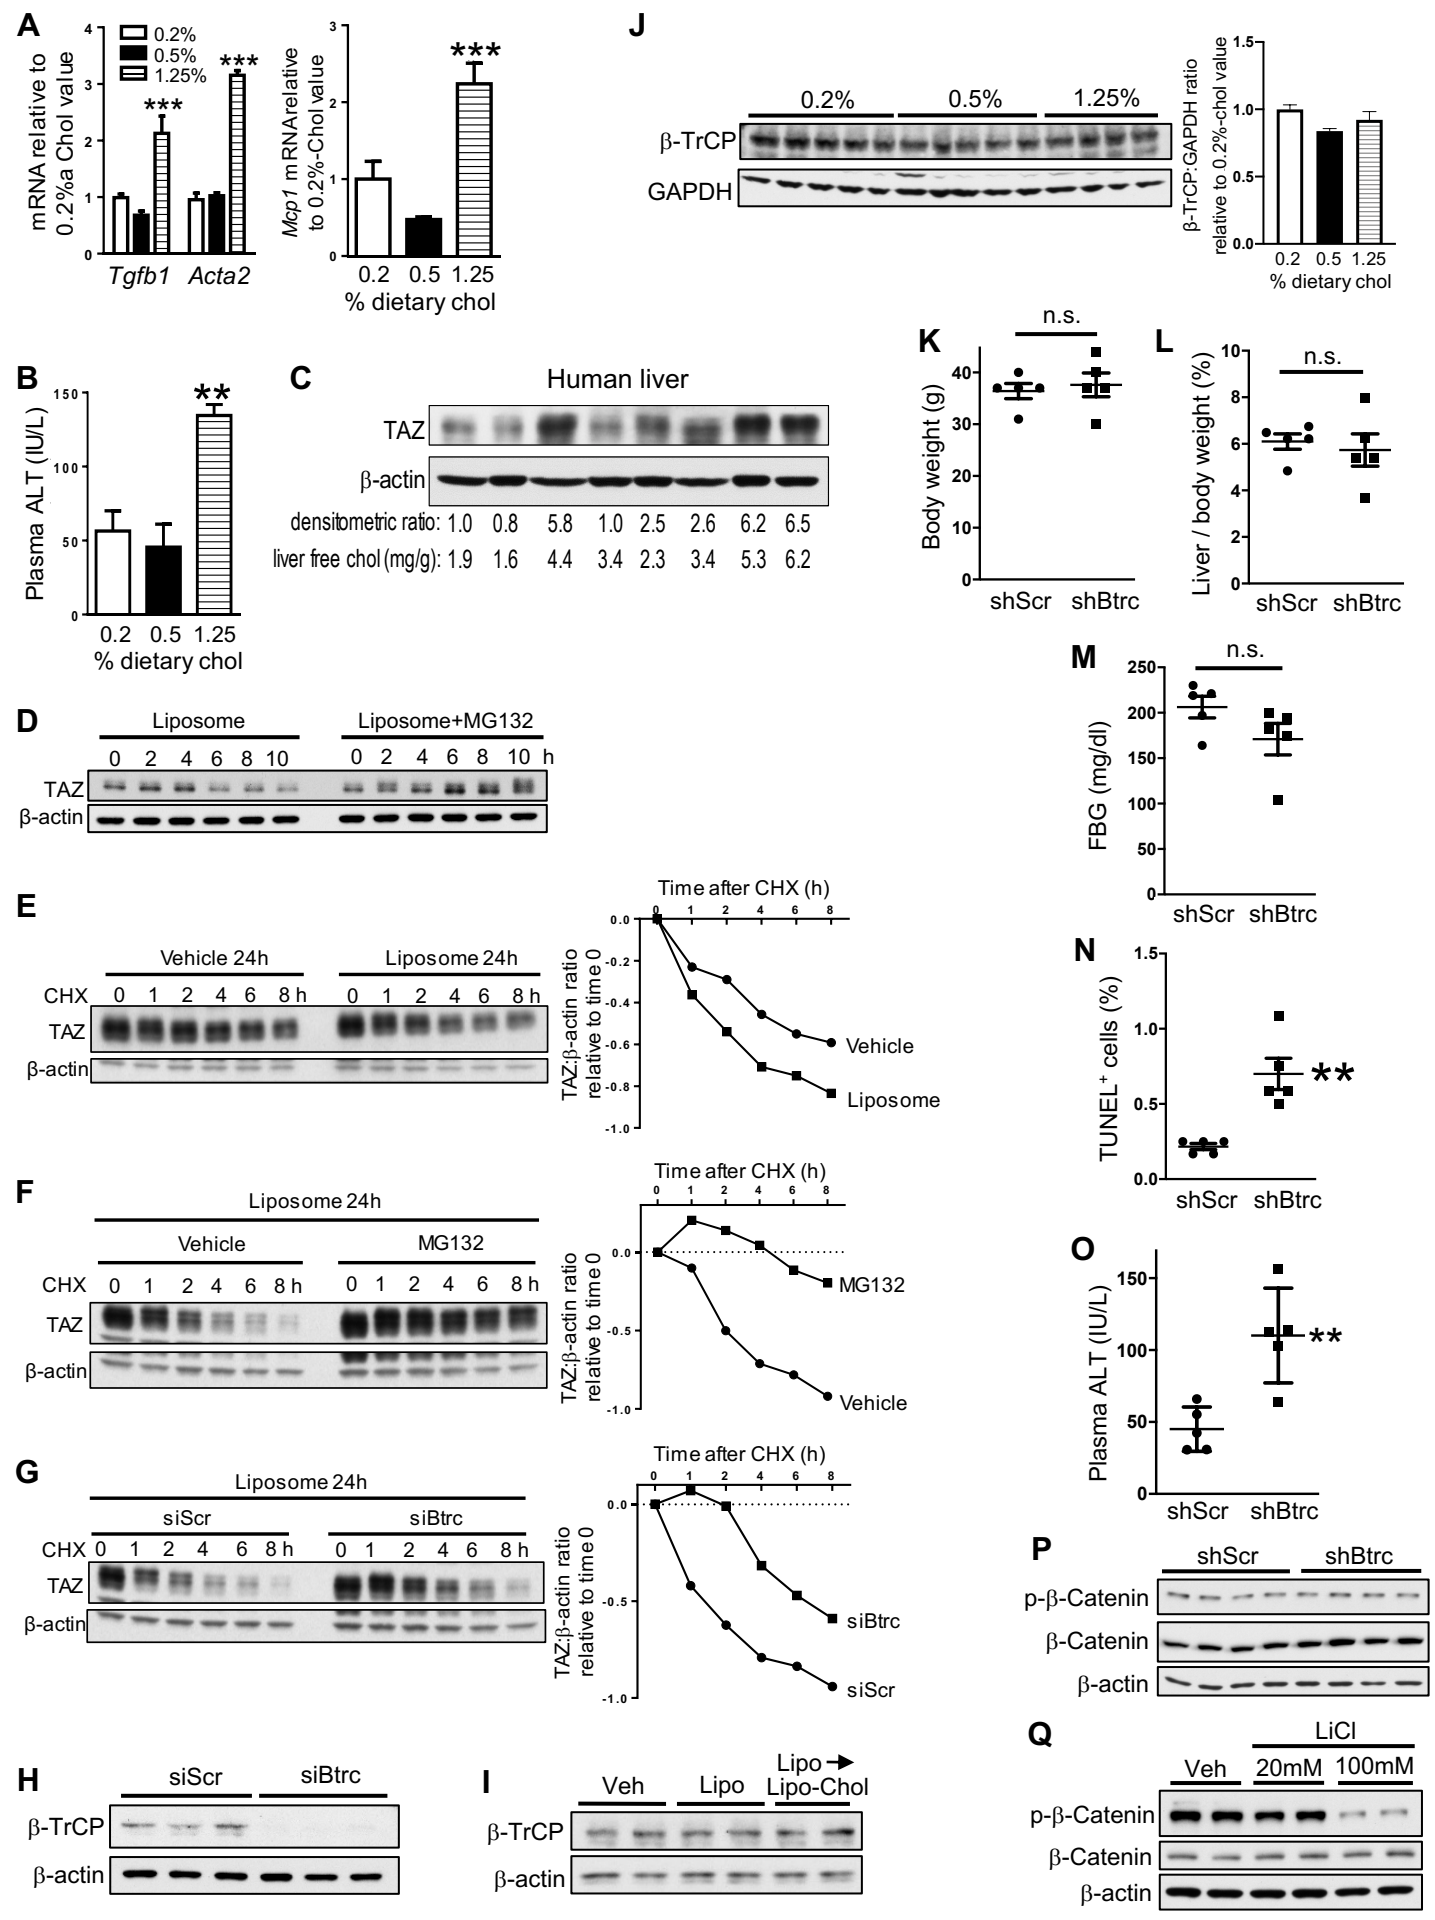

**Figure S1. Related to Figure 1. TAZ in Human NASH Liver, Evidence that Cholesterol Stabilizes TAZ Against Proteasomal Degradation, and Further Characterization of NAFLD Mice Treated with AAV8-H1-shBtrc.**

(A-B) The following parameters were measured in mice fed the NAFLD diet containing 0.2%, 0.5%, and 1.25% cholesterol for 16 weeks ( $n = 5$  mice/group; means  $\pm$  SEM; \*\* $p < 0.01$ , \*\*\* $p < 0.001$ ):

(A) Liver *Tgfb1*, *Acta2* ( $\alpha$ -SMA), and *Mcp1* mRNAs.

(B) Plasma ALT.

(C) TAZ immunoblot of human liver sections from the 8 subjects in Figure 1D, with densitometric ratio of TAZ: $\beta$ -actin and liver free cholesterol content shown below each lane.

(D) TAZ immunoblot of AML12 cells treated for 0-10 h with liposomes  $\pm$  10 nM MG132.

(E) TAZ immunoblot, with quantification, of AML12 cells that were incubated for 24 h with vehicle or liposomes, with 10 ng/ml cycloheximide (CHX) included for 0-8 h during the end of this period.

(F) TAZ immunoblot, with quantification, of AML12 cells that were incubated for 24 h with vehicle or liposomes, with 10 ng/ml cycloheximide (CHX)  $\pm$  10 nM MG132 included for 0-8 h during the end of this period.

(G) TAZ immunoblot of siSrc- or siBtrc-transfected AML12 cells that were incubated for 24 h with liposomes, with 10 ng/ml cycloheximide (CHX) included for 0-8 h during the end of this period.

(H)  $\beta$ -TrCP immunoblot of AML12 cells transfected with siScr or siBtrc.

(I)  $\beta$ -TrCP immunoblot of AML12 cells that were incubated for 24 h with vehicle or liposomes, or 16 h with liposomes followed by 8 h with Lipo-Chol.

(J)  $\beta$ -TrCP immunoblot of liver extracts, with quantification, from mice fed 16 weeks with the NAFLD diet containing 0.2%, 0.5%, and 1.25% cholesterol.

(K-P) The following parameters were measured in mice fed the NAFLD diet containing 0.2% cholesterol for 16 weeks, with AAV8-H1-shBtrc or AAV8-H1-shScr injected at the 8-week time point ( $n = 5$  mice/group; means  $\pm$  SEM; \*\* $p < 0.01$ ; n.s., non-significant):

(K) Body weight.

(L) Liver weight as a percentage of body weight.

(M) Fasting plasma glucose.

(N) TUNEL<sup>+</sup> cells in the liver.

(O) Plasma ALT.

(P) Immunoblots of phospho-Ser<sup>31,37</sup>Thr<sup>41</sup> and total  $\beta$ -catenin of liver extracts.

(Q) Immunoblots of phospho-Ser<sup>31,37</sup>Thr<sup>41</sup> and total  $\beta$ -catenin of AML12 cells that were incubated for 4 h with vehicle or 20-100 mM LiCl.

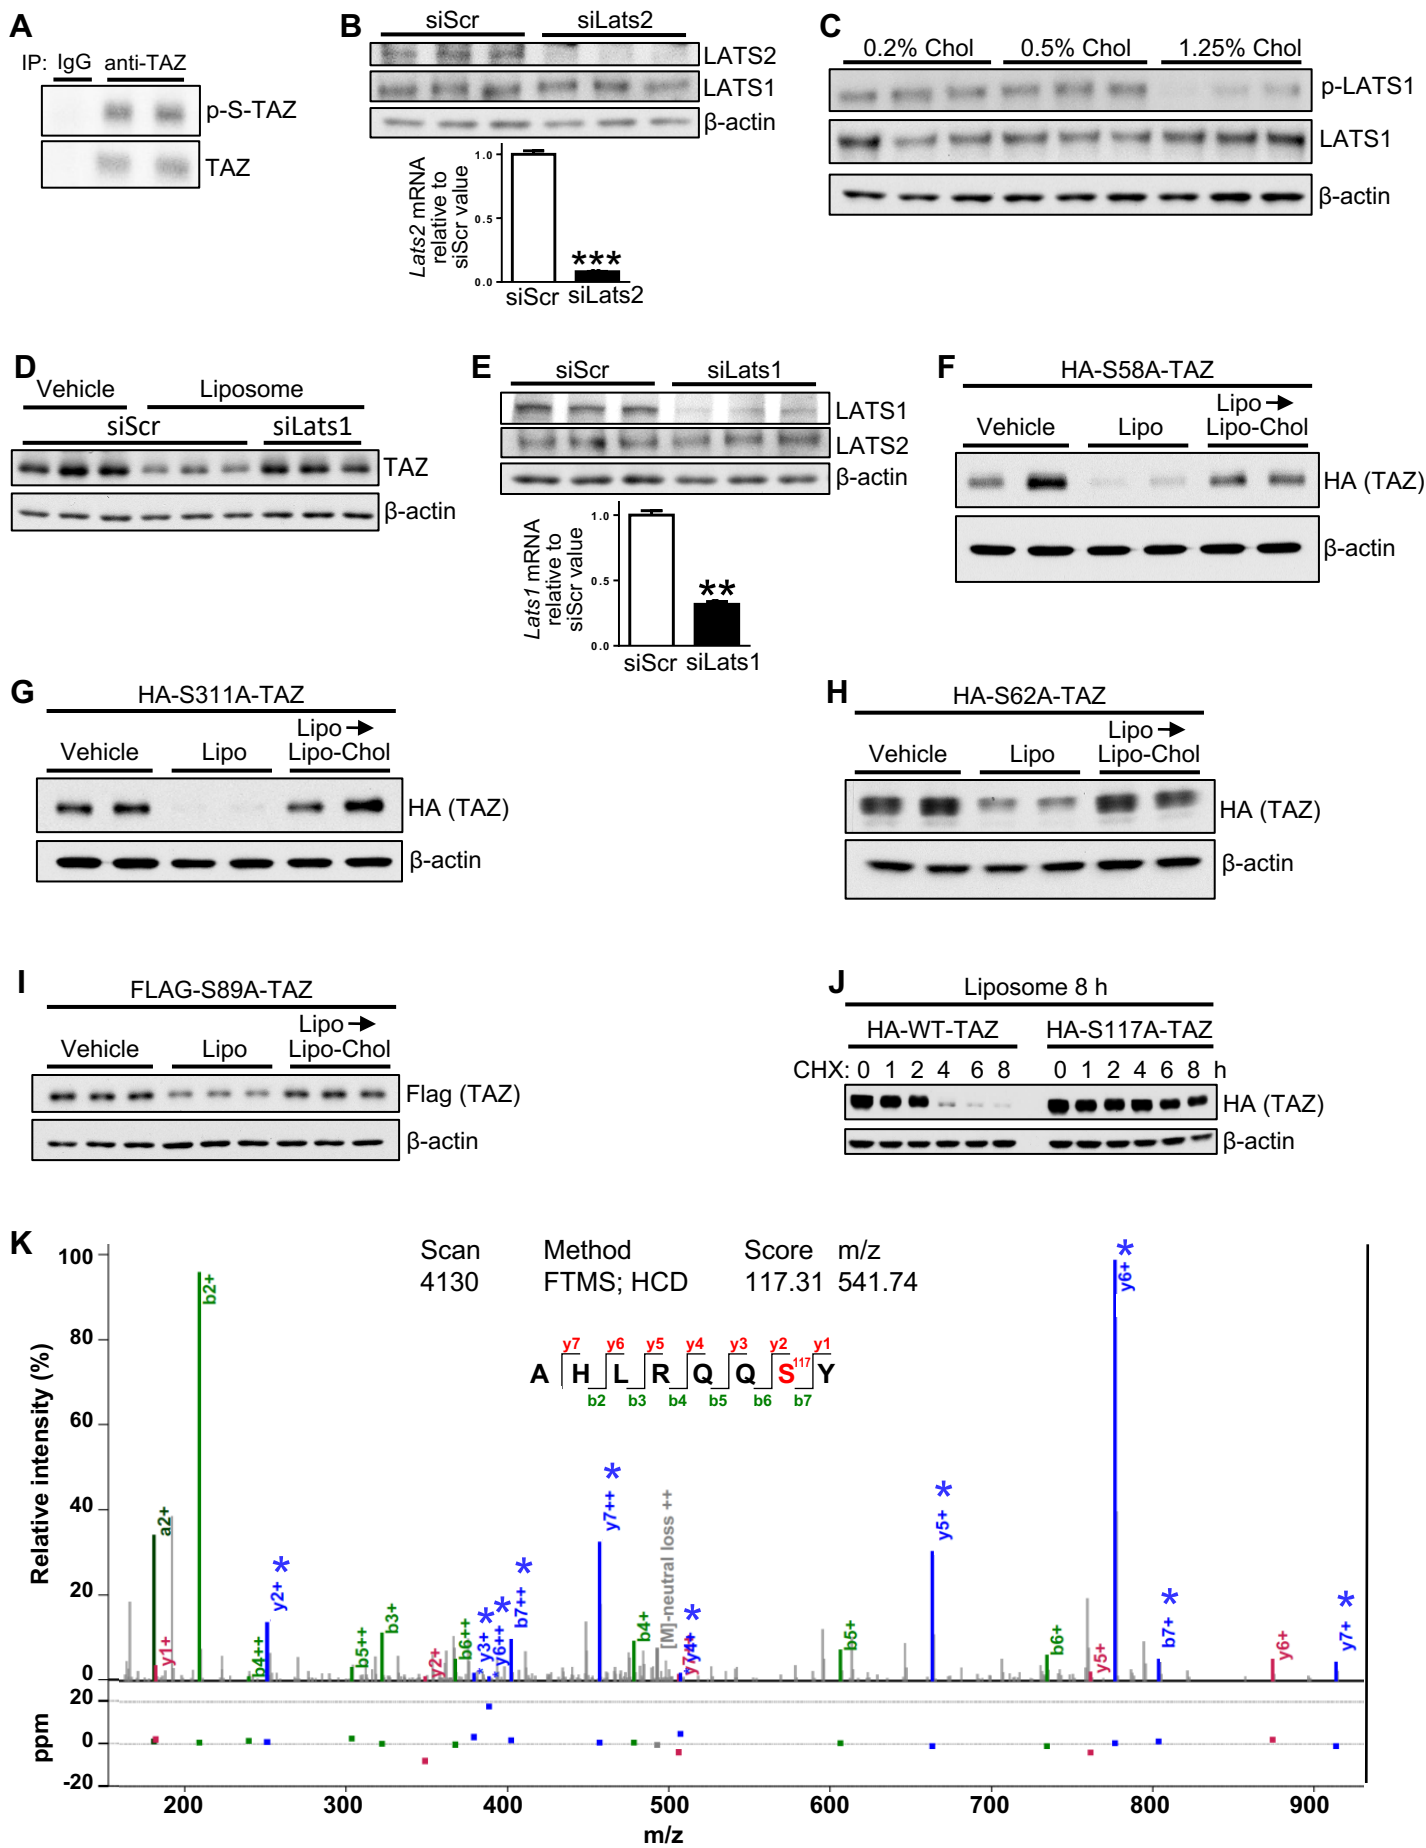

**Figure S2. Related to Figure 2. Effect of Individual Serine-Alanine Mutations on Cholesterol-Mediated Increase in TAZ, and Mass Spectroscopy Evidence that TAZ is Phosphorylated on S117.**

(A) Phospho-serine and total TAZ immunoblots in TAZ immunoprecipitates of AML12 cell extracts.

(B) LATS1 and LATS2 immunoblots and *Lats2* mRNA of siScr- or siLats2-transfected AML12 cells ( $n = 4$  biological replicates; values shown are means  $\pm$  SEM; \*\*\* $p < 0.001$ ).

(C) Phospho- and total LATS1 immunoblots in liver extracts from mice fed 16 weeks with the NAFLD diet containing 0.2%, 0.5%, or 1.25% cholesterol.

(D) TAZ immunoblot of siScr- or siLats1-transfected AML12 cells that were incubated for 24 h with vehicle or liposomes.

(E) LATS1 and LATS2 immunoblots and *Lats1* mRNA ( $n = 4$  biological replicates; means  $\pm$  SEM; \*\* $p < 0.01$ ).

(F-I) HA- or FLAG-TAZ immunoblots of AML12 cells transfected with the indicated mutant TAZ constructs and then incubated for 24 h with vehicle, or liposomes for 16 h and then Lipo-Chol for 8 h.

(J) HA-TAZ immunoblot of AML12 cells transfected with HA-WT-human TAZ or HA-S117A-human TAZ and then incubated for 8 h, with 10 ng/ml cycloheximide (CHX) included for the indicated times during this period.

(K) LC-MS/MS spectrum analysis of TAZ peptides from HepG2 cells that had been incubated for 4 h with 10 nM MG132 and liposomes. The analysis identified phosphopeptide AHLRQQS<sup>117</sup>(P)Y, whose sequence is shown with y and b ions indicated and with the phosphorylated serine (S117) indicated in red. The numbers paired with each ion identification, e.g., b3 and y5, indicate the number of amino acids present on N-terminal fragments for b ions and C-terminal fragments for y ions. Peaks in the spectrum that are green correspond to matched b ions and peaks that are red correspond to matched y ions, with good sequence coverage of spectral lines for the y2, y3, y4, y5, y6, y7, and b7 fragments, noted by the blue asterisks.

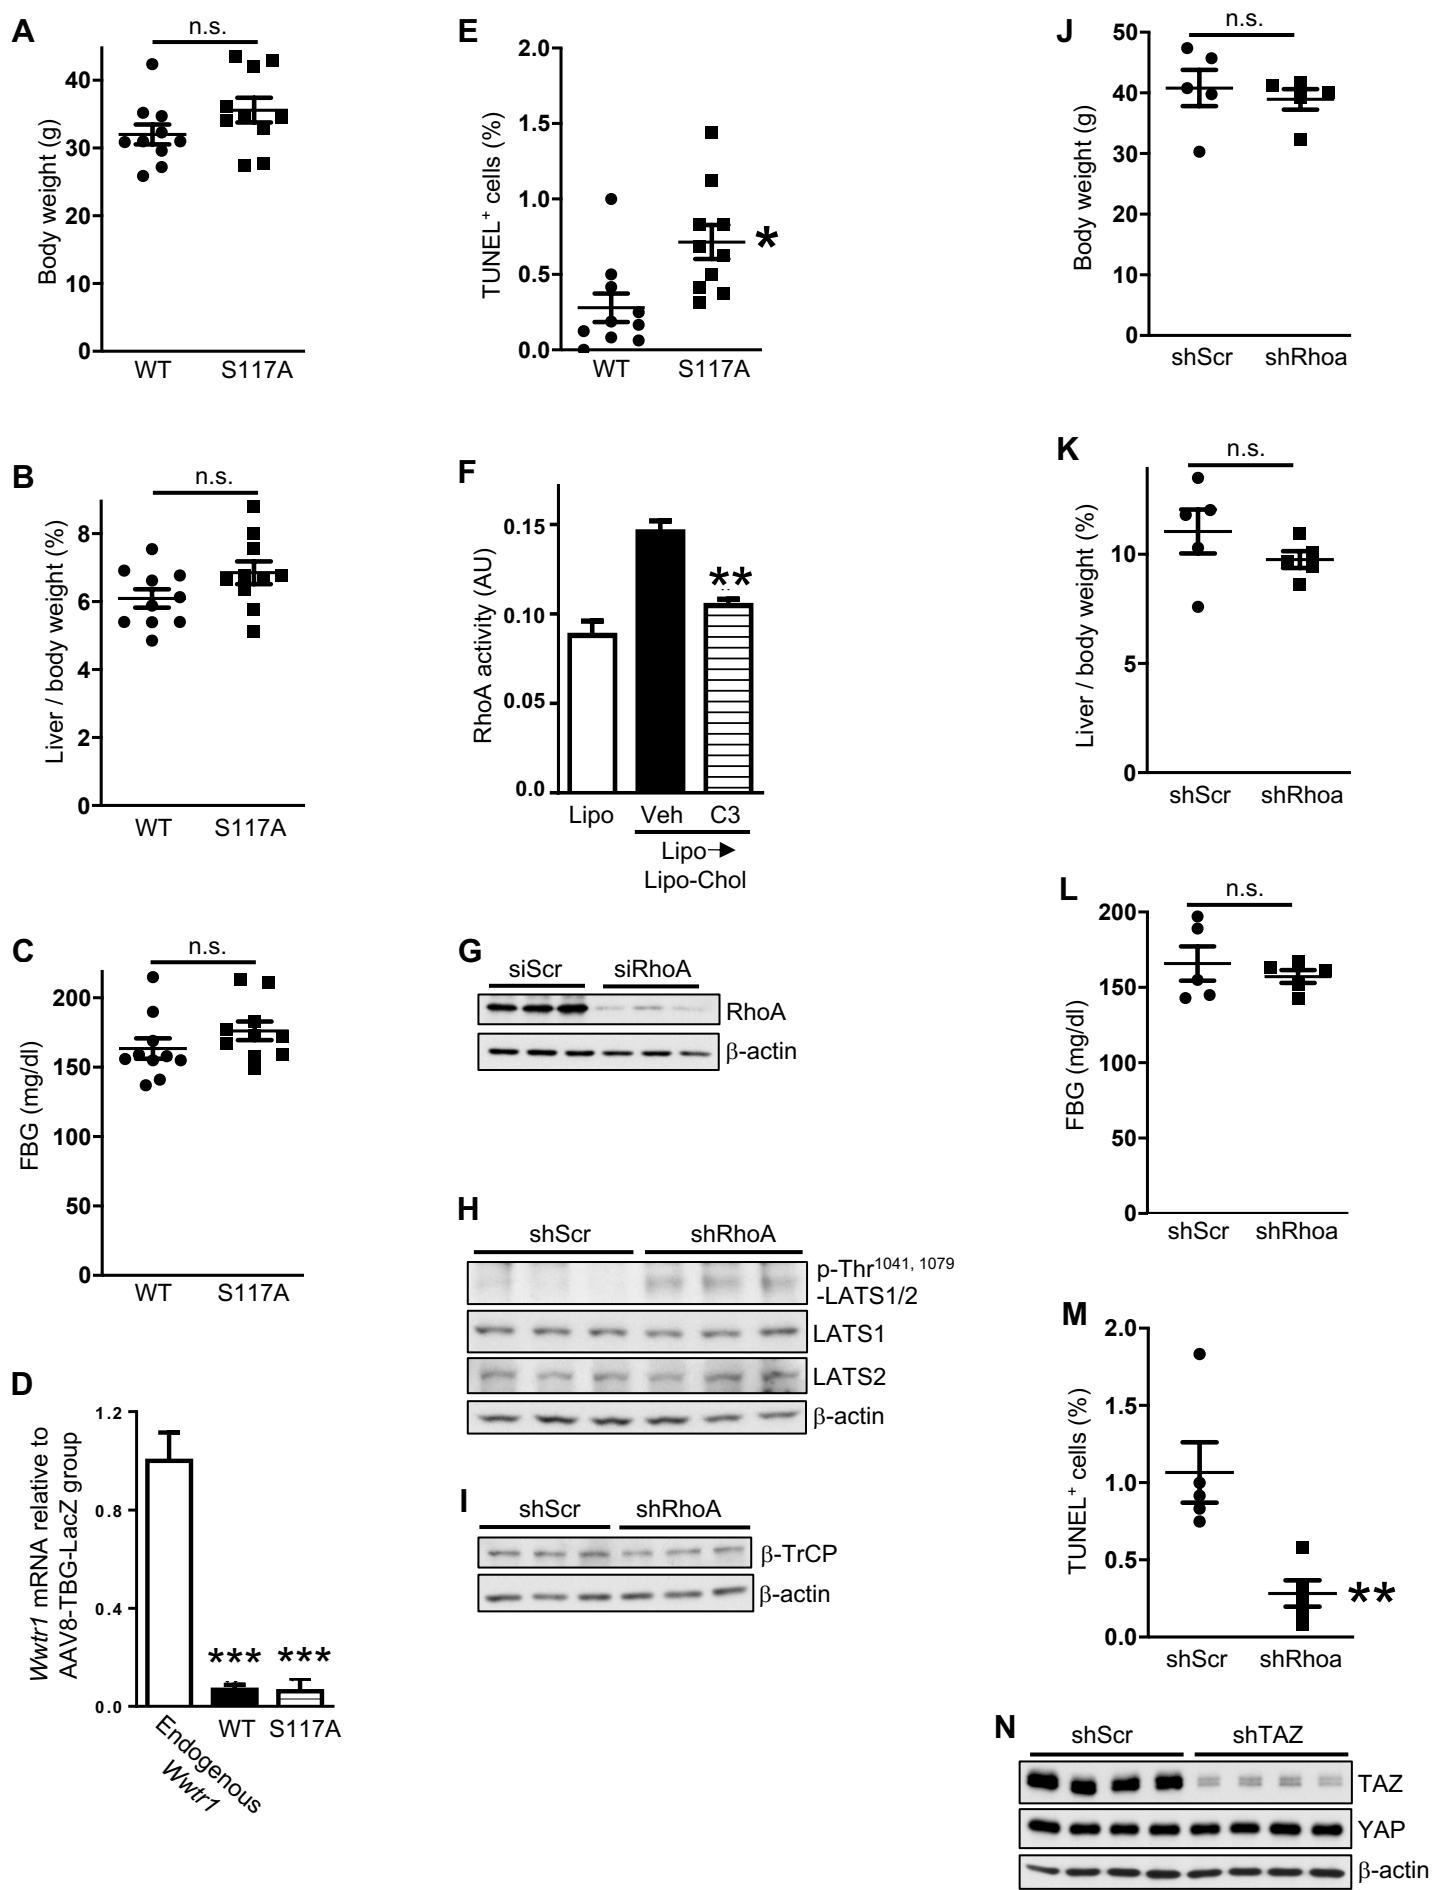

**Figure S3. Related to Figures 2 and 3. Further Characterization of NASH Mice Transduced with AAV8-TBG-S117A-TAZ or with AAV8-H1-shRhoa.**

(A-E) The following parameters were measured in *Wwtr1<sup>fl/fl</sup>* mice fed the NAFLD diet containing 0.2% cholesterol for 16 weeks, with AAV8-TBG-Cre plus either AAV8-TBG-HA-WT-hTAZ (WT) or AAV8-TBG-HA-S117A-hTAZ (S117A) injected at the 8-week time point (n = 10 mice/group; means  $\pm$  SEM; \*p < 0.05; \*\*\*p < 0.001; n.s., non-significant):

(A) Body weight.

(B) Liver weight as a percentage of body weight.

(C) Fasting plasma glucose.

(D) Liver *Wwtr1* mRNA in *Wwtr1<sup>fl/fl</sup>* mice treated with AAV8-TBG-LacZ instead of AAV8-TBG-Cre and without AAV8-TBG-hTAZ ("Endogenous *Wwtr1*").

(E) TUNEL<sup>+</sup> cells in the liver.

(F) RhoA activity of AML12 cells that were incubated for 24 h with liposomes (Lipo) or for 16 h with liposomes and then 8 h with Lipo-Chol  $\pm$  1  $\mu$ g/ml C3 transferase Rho inhibitor (C3) included during the last 4 h (n = 4 biological replicates; means  $\pm$  SEM; \*\*p < 0.01 versus Veh).

(G) RhoA immunoblot of AML12 cells that were transfected with siScr or siRhoa.

(H-M) The following parameters were assayed in mice fed the NASH diet for 16 weeks, with AAV8-H1-shRhoa or AAV8-H1-shScr administered at the 8-week time point (n = 5 mice/group; values shown are means  $\pm$  SEM; \*\*p < 0.01; n.s., non-significant):

(H) Liver phospho-Thr<sup>1041, 1079</sup>-LATS1/2, LATS1, and LATS2 immunoblots.

(I) Liver  $\beta$ -TrCP immunoblot.

(J) Body weight.

(K) Liver weight as a percentage of body weight.

(L) Fasting plasma glucose.

(M) TUNEL<sup>+</sup> cells in the liver.

(N) TAZ and YAP immunoblots in liver extracts from mice fed 16 weeks with the NASH diet, with AAV8-H1-shTAZ or AAV8-H1-shScr administered at the 8-week time point.

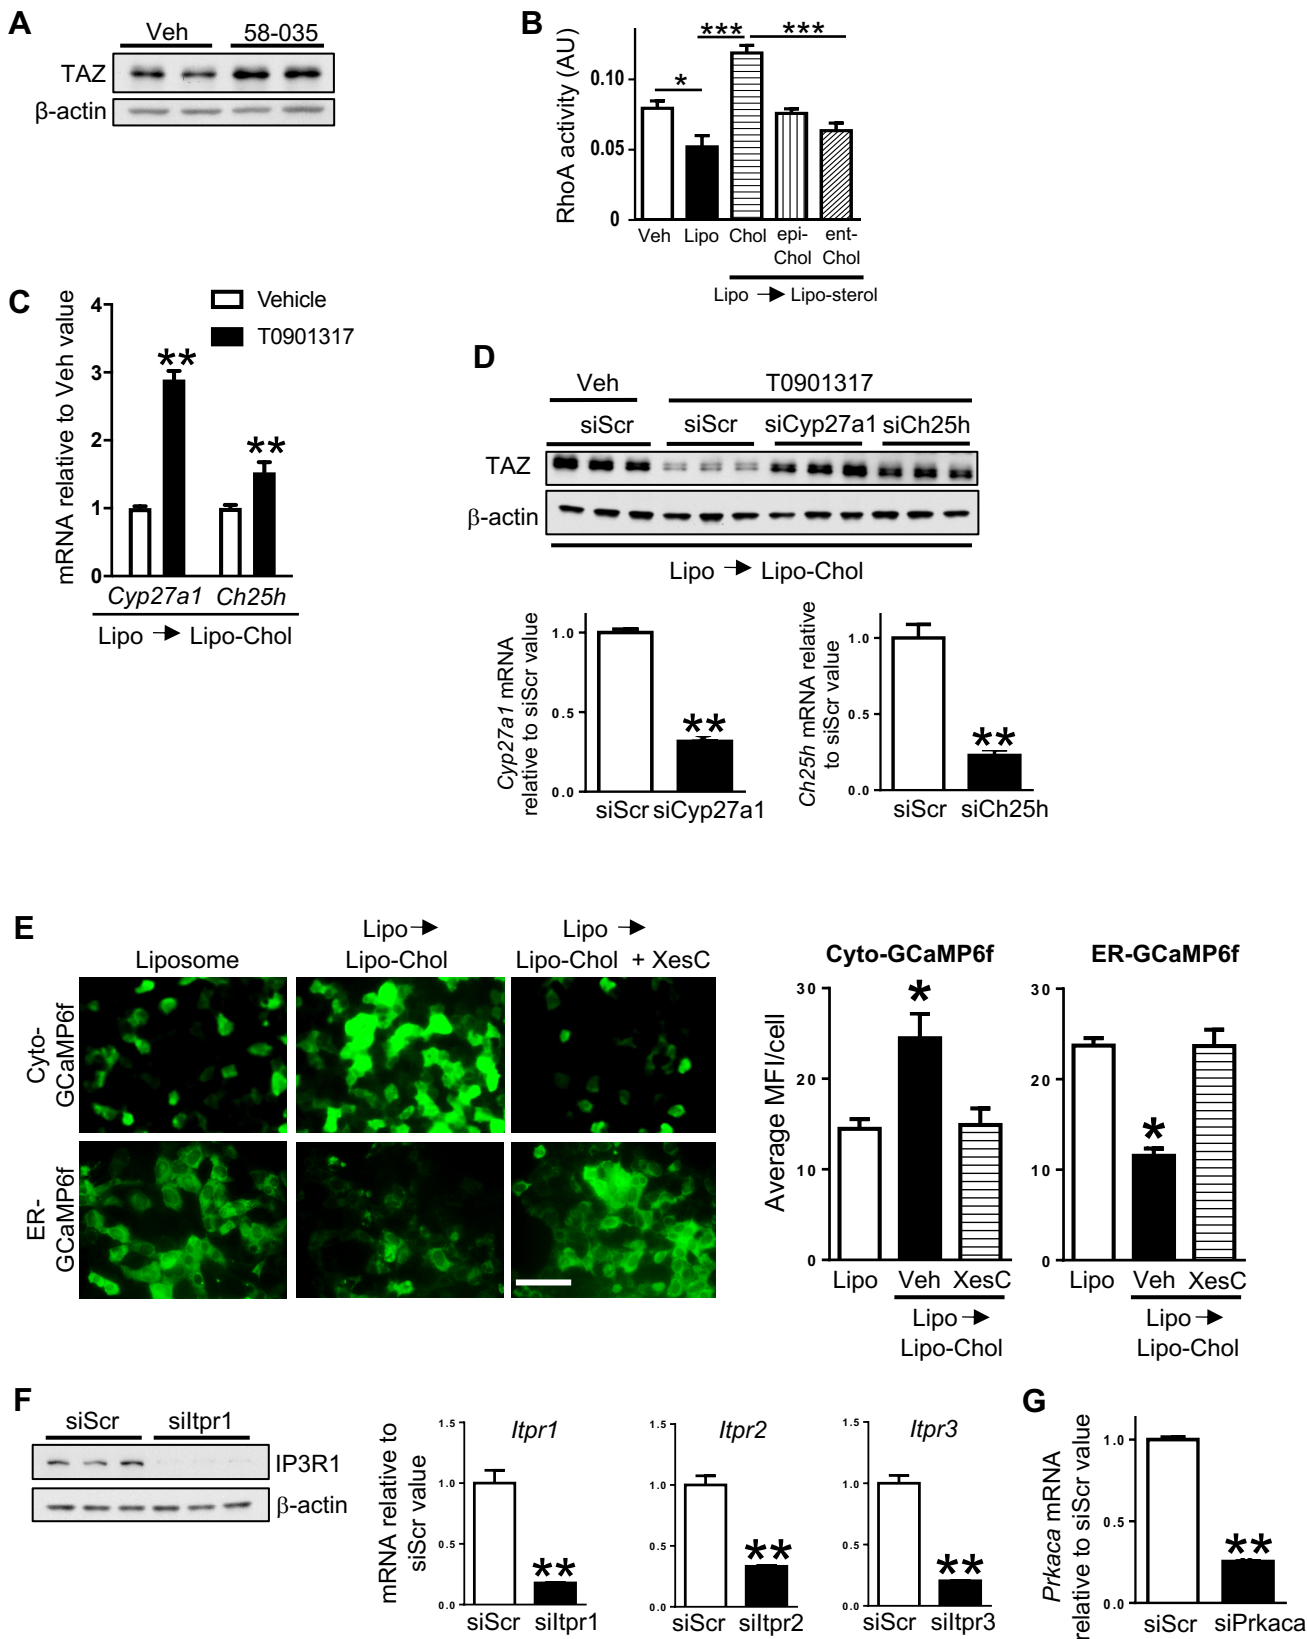

**Figure S4. Related to Figure 4. Cholesterol Specificity of the TAZ Pathway and IP3R-Mediated Calcium Changes.**

(A) TAZ immunoblot of AML12 cells that were incubated for 8 h with vehicle or 30  $\mu$ M of the ACAT inhibitor 58-035.

(B) RhoA activity of AML12 cells that were incubated for 18 h with vehicle or liposomes, or 16 h with liposomes and then 2 h with sterol-rich liposomes (Lipo  $\rightarrow$  Lipo-sterol) containing cholesterol (Chol), *epi*-cholesterol (*epi*-Chol), or *ent*-cholesterol (*ent*-Chol) ( $n = 4$  biological replicates; means  $\pm$  SEM; \* $p < 0.05$ , \*\*\* $p < 0.001$ ).

(C) *Cyp27a1* and *Ch25h* mRNAs in AML12 cells that were incubated for 16 h with liposomes and then 24 h with Lipo-Chol  $\pm$  20  $\mu$ M T0901317 ( $n = 4$  biological replicates; means  $\pm$  SEM; \*\* $p < 0.01$ ).

(D) TAZ immunoblot and *Cyp27a1*, and *Ch25h* mRNA levels of AML12 cells were transfected with siScr, siCyp27a1, or siCh25h and then incubated for 16 h with liposomes followed by 24 h with Lipo-Chol  $\pm$  20  $\mu$ M T0901317 ( $n = 4$  biological replicates; means  $\pm$  SEM; \*\* $p < 0.01$ ).

(E) Images and mean fluorescence intensity (MFI) per cell of AML12 cells transduced with cyto-GCaMP6f or ER-GCaMP6f and then incubated for 16.5 h with liposomes or 16 h with liposomes and then 30 minutes with Lipo-Chol  $\pm$  2  $\mu$ M xestospongine C (XesC) ( $n = 3$  biological replicates; means  $\pm$  SEM; \* $p < 0.05$  versus other groups). Scale bar, 100  $\mu$ m.

(F) IP3R1 immunoblot and *Itpr1*, *Itpr2*, and *Itpr3* mRNA levels of AML12 cells that were transfected with siScr, siltpr1, siltpr2, or siltpr3 ( $n = 4$  biological replicates; means  $\pm$  SEM; \*\* $p < 0.01$ ).

(G) *Prkaca* mRNA in AML12 cells that were transfected with siScr or siPrkaca ( $n = 4$  biological replicates; means  $\pm$  SEM; \*\* $p < 0.01$ ).



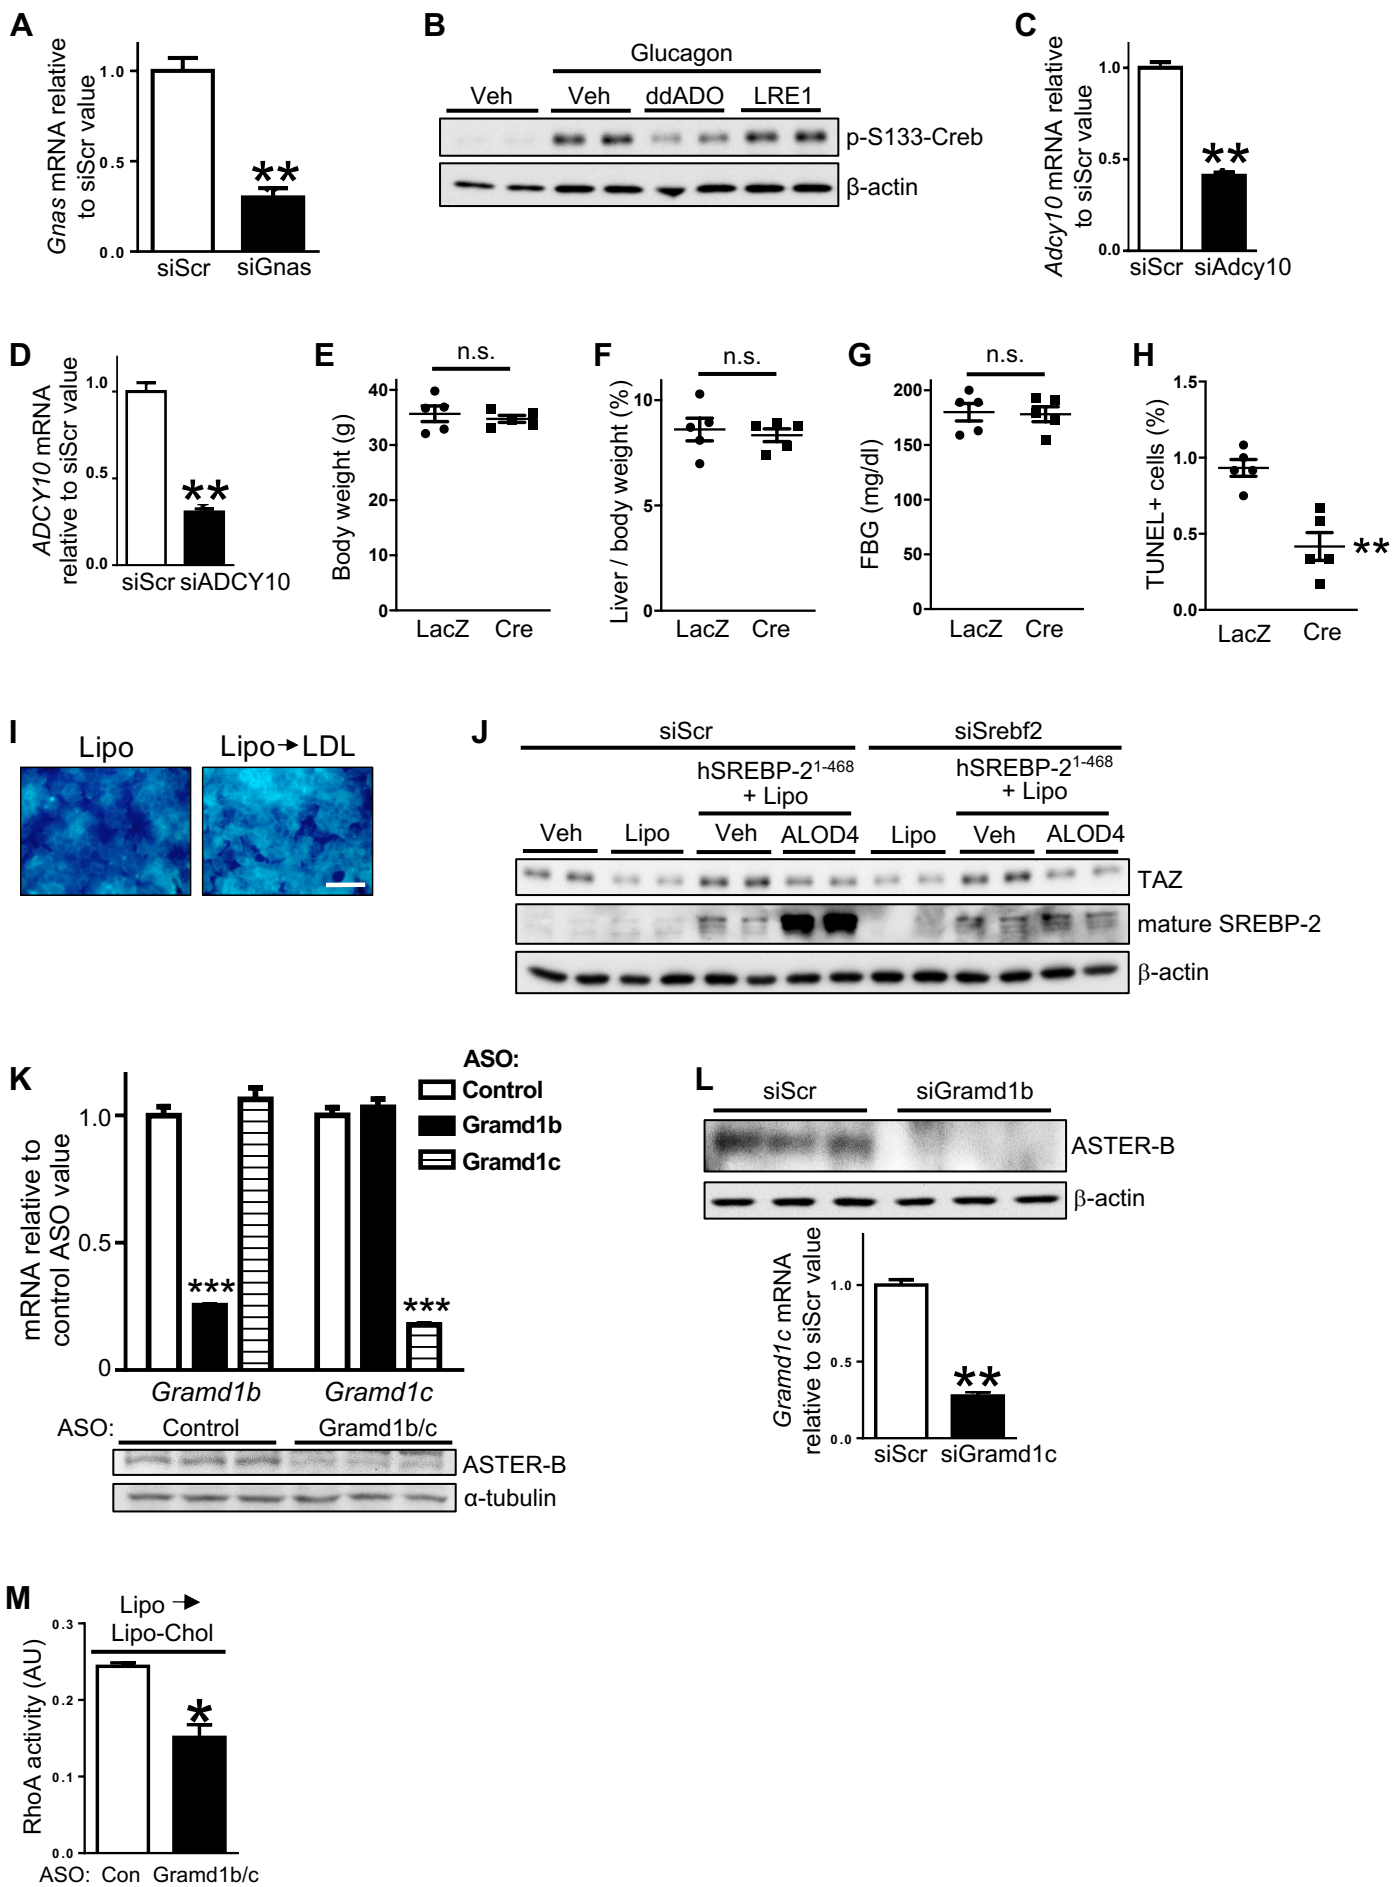

**Figure S5. Related to Figures 5 and 6. Additional Data Related to Adenylyl Cyclase and *Gramd1b/c*.**

(A) *Gnas* mRNA in AML12 cells were transfected with siScr or siGnas ( $n = 4$  biological replicates; means  $\pm$  SEM; \*\* $p < 0.01$ ).

(B) Phospho-S133-Creb immunoblot of primary mouse hepatocytes that were incubated for 30 min with vehicle or 200 nM glucagon  $\pm$  10  $\mu$ M 2',5'-dideoxyadenosine (ddAdo) or 30  $\mu$ M LRE1.

(C) *Adcy10* mRNA of AML12 cells that were transfected with siScr or siAdcy10 ( $n = 4$  biological replicates; means  $\pm$  SEM; \*\* $p < 0.01$ ).

(D) *ADCY10* mRNA of primary human hepatocytes that were transfected with siScr or siADCY10 ( $n = 6$  biological replicates; means  $\pm$  SEM; \*\* $p < 0.01$ ).

(E-H) The following parameters were assayed in *Adcy10<sup>fl/fl</sup>* mice fed the NASH diet for 16 weeks, with AAV8-TBG-Cre or AAV8-TBG-LacZ administered at the 8-week time point ( $n = 5$  mice/group; means  $\pm$  SEM, \*\* $p < 0.01$ , n.s., non-significant):

(E) Body weight.

(F) Liver weight as a percentage of body weight.

(G) Fasting plasma glucose.

(H) TUNEL<sup>+</sup> cells in the liver.

(I) Filipin staining of AML12 cells that were incubated for 24 h with liposomes or 24 h with liposomes and then 8 h with 100  $\mu$ g/ml LDL. Scale bar, 100  $\mu$ m.

(J) TAZ and mature SREBP-2 immunoblots of AML12 cells transfected with siScr or siSrebf2 targeting endogenous SREBP-2 and treated as follows: incubated for 24 h with vehicle or liposomes; or transfected with human SREBP-2(1-468) and then incubated for 24 h with liposomes  $\pm$  10  $\mu$ M ALOD4 included during the last 4 h.

(K) *Grand1b* and *Grand1c* mRNA levels and ASTER-B immunoblot of AML12 cells were transfected with control ASO or ASO targeting *Grand1b* or *Grand1c* ( $n = 4$  biological replicates; means  $\pm$  SEM; \*\*\* $p < 0.001$  versus other groups).

(L) ASTER-B immunoblot and *Grand1c* mRNA level of AML12 cells were transfected with siScr or siGrand1b ( $n = 4$  biological replicates; means  $\pm$  SEM; \*\* $p < 0.01$ ).

(M) RhoA activity of AML12 cells that were treated with control ASO or ASO targeting *Grand1b* and *Grand1c* and then incubated for 24 h with liposomes followed by 2 h with Lipo-Chol ( $n = 4$  biological replicates; means  $\pm$  SEM; \* $p < 0.05$ ).

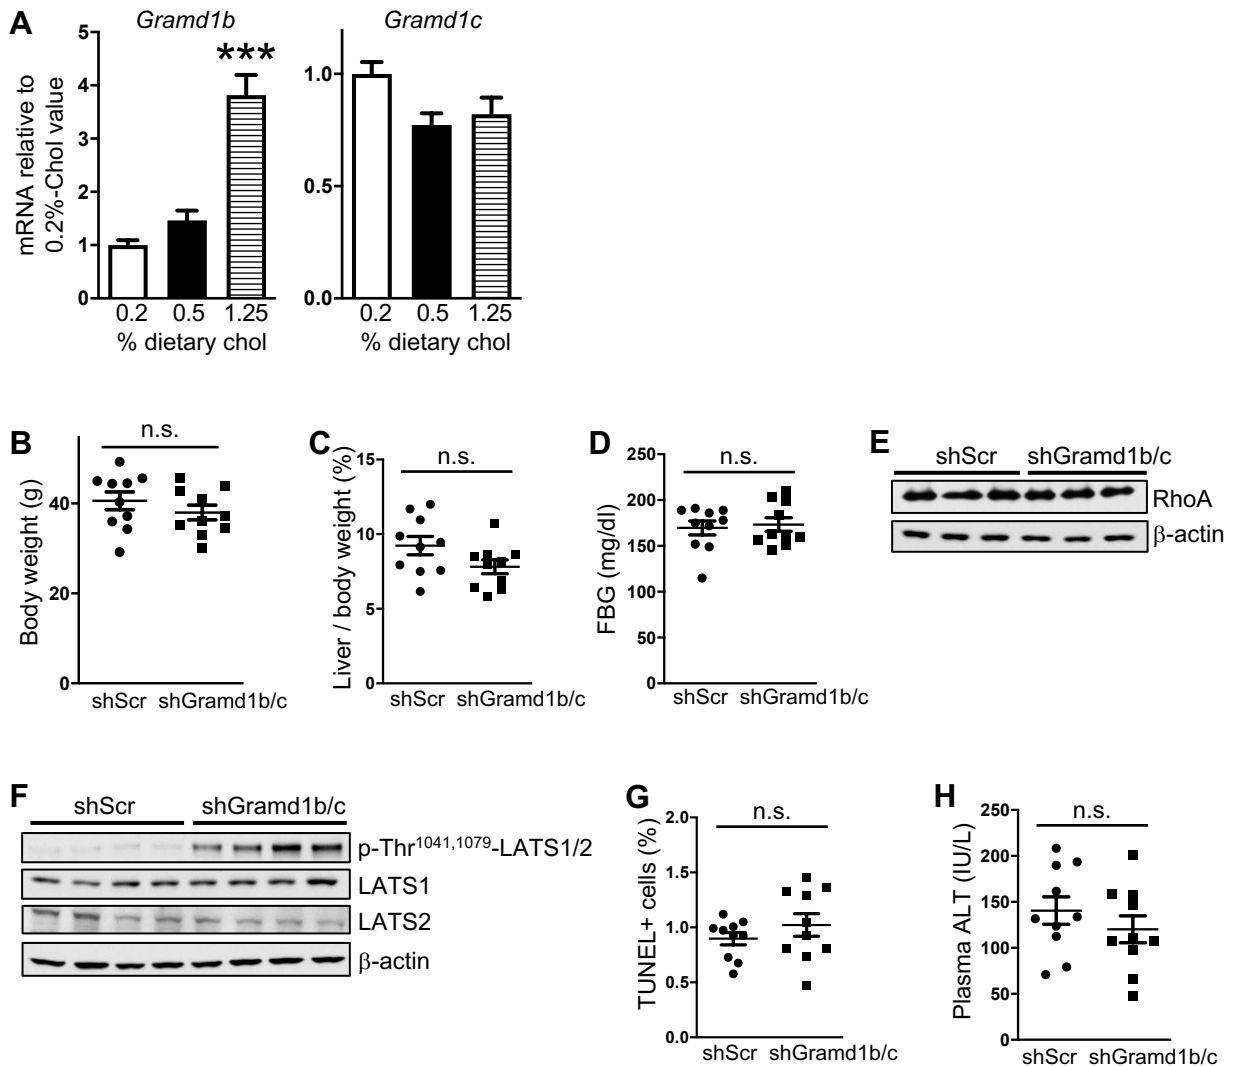

**Figure S6. Related to Figure 7. Further Characterization of NASH Mice Treated with AAV8-H1-shGramd1b/c.**

(A) *Gramd1b* and *Gramd1c* mRNA levels of liver extracts from mice fed 16 weeks with the NAFLD diet containing 0.2%, 0.5%, and 1.25% cholesterol (n = 5; means ± SEM; \*\*\*p < 0.001).

(B-H) The following parameters were assayed in mice fed the NASH diet for 16 weeks, with AAV8-H1-shGramd1b/c or AAV8-H1-shSrc administered at the 8-week time point (n = 10 mice/group; means ± SEM; n.s., non-significant):

(B) Body weight.

(C) Liver weight as a percentage of body weight.

(D) Fasting plasma glucose.

(E) Liver RhoA immunoblot.

(F) Liver phospho-Thr<sup>1041,1079</sup>-LATS1/2, LATS1, and LATS2 immunoblots.

(G) TUNEL<sup>+</sup> cells in the liver.

(H) Plasma ALT.
