# Supplementary material
Source: PubMed Central journal article supplement (PMC7313619)
Supplement: NIHMS1577153-supplement-Suppl_Tables.pdf [file NIHMS1577153-supplement-Suppl_Tables.pdf]

**Table S1 (related to Figures 1D and 3F). Pathology of human NASH liver samples.**

| <b>ID</b> | <b>Age</b> | <b>Gender</b> | <b>Pathological diagnoses</b>                                                                                                                                                                                                                                                         |
|-----------|------------|---------------|---------------------------------------------------------------------------------------------------------------------------------------------------------------------------------------------------------------------------------------------------------------------------------------|
| 1         | 68         | Male          | Non-alcoholic steatohepatitis; cirrhosis, mixed macronodular and micronodular type. Minimal inflammatory activity, with minimal or no ongoing steatosis. No evidence of hepatocyte dysplasia or malignancy.                                                                           |
| 2         | 56         | Female        | Type 2 Diabetes. Obesity. Advanced chronic liver disease (stage 4: "cirrhosis"). Marked fibrosis throughout the entire liver. The residual hepatocellular parenchyma shows abundant well-formed Mallory hyaline, consistent with advanced chronic liver disease from steatohepatitis. |
| 3         | 53         | Male          | NASH. Cirrhosis. Mild steatosis and focal active steatohepatitis. Focal Mallory hyaline is identified.                                                                                                                                                                                |
| 4         | 67         | Female        | Cirrhosis, NASH. Active steatohepatitis, grade 2 of 3.                                                                                                                                                                                                                                |
| 5         | 64         | Female        | NASH. Cirrhosis with steatohepatitis and moderate macrovesicular steatosis.                                                                                                                                                                                                           |
| 6         | 62         | Female        | Fatty liver. Cirrhosis. Cirrhosis with moderate macrovesicular steatosis (35%) and focal steatohepatitis, consistent with fatty liver disease.                                                                                                                                        |
| 7         | 43         | Female        | Fatty liver. Cirrhosis with focal steatosis and mild activity.                                                                                                                                                                                                                        |
| 8         | 57         | Female        | NASH cirrhosis                                                                                                                                                                                                                                                                        |

**Table S2 (related to Figure 2 and Figure S2). Primers used for *WWTR1* mutagenesis.**

| Primers | 5'- Sequence -3'                    |
|---------|-------------------------------------|
| S58A F  | CCTGATgcgGGCTCGCACTCGC              |
| S58A R  | CTCCTTAAAG AAAGACTCCG GCAGGATCTT CT |
| S62A F  | TCGCACgcgCGCCAGTCCAG                |
| S62A R  | GCCCGAATCA GGCTCCTTAA AGAAAGACTC C  |
| S89A F  | TCGCACgcgTCGCCCGCGTCC               |
| S89A R  | GCGGACATGC TGGGCACCC                |
| S117A F | CAGCAGgccTACGACGTGACCGACG           |
| S117A R | GCGGAGGTGC GCGTGCTGC                |
| S311A F | GAGCAGgccACTGACAGTGGCCTG            |
| S311A R | CCTCGAATGA TATGGCCCTC CATTGAGGAA AG |

Note: lower case letters indicate the mutated nucleotide based on the sequence of WT human *WWTR1* mRNA.

**Table S3 (related to all figures). siRNA and shRNA sequences used in this study.**

| <b>Target Gene</b>              | <b>siRNA or shRNA</b> | <b>siRNA Sense Sequences (5' to 3')</b>          |
|---------------------------------|-----------------------|--------------------------------------------------|
| <i>Btrc</i> ( $\beta$ -TrCP)    | siRNA                 | rGrArGrCrUrArArArUrUrGrUrGrArUrArCrCrUrUrCrCrUGT |
| <i>Btrc</i> ( $\beta$ -TrCP)    | shRNA                 | GCGACATAGTTTACAGAGAAT                            |
| <i>Lats2</i>                    | siRNA                 | rArArGrArUrUrGrUrArUrUrUrArUrGrGrUrArArArGrGAA   |
| <i>Rhoa</i>                     | siRNA                 | rCrUrArCrCrArGrUrArUrUrUrArGrArArGrCrCrArArCrCAC |
| <i>Rhoa</i>                     | shRNA                 | GTCAAGCATTCTGTCCAAAT                             |
| <i>Itpr1</i> (IP3R1)            | siRNA                 | rGrUrUrUrCrArUrCrUrGrCrArArGrCrUrArArUrArArACA   |
| <i>Itpr2</i> (IP3R2)            | siRNA                 | rGrCrUrUrUrGrArArGrUrArUrUrArCrGrCrCrArArCrCrACA |
| <i>Itpr3</i> (IP3R3)            | siRNA                 | rGrUrCrCrUrGrCrUrUrArGrUrArCrCrGrUrUrGrArArGrAGA |
| <i>Prkaca</i> (PKA)             | siRNA                 | rGrGrArUrCrArGrUrUrUrGrArUrArGrArArUrCrArArGrACC |
| <i>Gramd1b</i><br>(ASTER-B)     | siRNA                 | rGrGrCrGrUrUrUrCrUrCrUrGrArUrArUrCrArUrCrUrUrCCA |
| <i>Gramd1b</i><br>(ASTER-B)     | shRNA                 | GATGAAGGACTCGCTTATCAA                            |
| <i>Gramd1c</i><br>(ASTER-C)     | siRNA                 | rCrArArGrUrCrArCrUrGrGrArCrUrUrGrArArUrArArGrAAT |
| <i>Gramd1c</i><br>(ASTER-C)     | shRNA                 | GGGAAAGAGATGAGAAGTTCT                            |
| <i>Adcy10</i> (sAC)             | siRNA                 | rGrArArArUrCrUrCrUrGrArCrGrArArUrGrArArGrArUrUCT |
| <i>ADCY10</i><br>(human sAC)    | siRNA                 | rCrArArUrCrArUrUrUrCrUrArArCrArUrGrUrCrArArArGAA |
| <i>Cyp27a1</i>                  | siRNA                 | rGrUrUrCrCrArGrArArCrUrCrArGrUrCrUrArUrArUrCrACT |
| <i>Ch25h</i>                    | siRNA                 | rArCrCrUrGrArUrUrUrCrUrGrArCrUrCrUrUrUrArArArUAA |
| <i>Gnas</i>                     | siRNA                 | rCrUrUrCrCrCrArCrCrUrGrArArUrUrCrUrArUrGrArGrCAT |
| <i>Srebp2</i> ( <i>Srebf2</i> ) | siRNA                 | rArGrGrCrArArGrArCrUrGrArUrUrGrUrUrCrUrGrArGrCTG |

**Table S4 (Related to all figures). Primers used for qPCR.**

| <b>Primers</b>               | <b>Organism</b> | <b>5'- Sequence -3'</b>    |
|------------------------------|-----------------|----------------------------|
| <i>Hprt</i> F                | mouse           | TCAGTCAACGGGGGACATAAA      |
| <i>Hprt</i> R                | mouse           | GGGGCTGTACTGCTTAACCAG      |
| <i>HPRT</i> F                | human           | CCTGGCGTCGTGATTAGTGAT      |
| <i>HPRT</i> R                | human           | AGACGTTTCAGTCCTGTCCATAA    |
| <i>Taz (Wwtr1)</i> F         | mouse           | CATGGCGGAAAAAGATCCTCC      |
| <i>Taz (Wwtr1)</i> R         | mouse           | GTCGGTCACGTCATAGGACTG      |
| <i>WWTR1</i> F               | human           | TCCCAGCCAAATCTCGTGATG      |
| <i>WWTR1</i> R               | human           | AGCGCATTGGGCATACTCAT       |
| <i>Tgfb1</i> F               | mouse           | CTCCCGTGGCTTCTAGTGC        |
| <i>Tgfb1</i> R               | mouse           | GCCTTAGTTTGGACAGGATCTG     |
| <i>Acta2</i> F               | mouse           | ATGCTCCCAGGGCTGTTTTCCCAT   |
| <i>Acta2</i> R               | mouse           | GTGGTGCCAGATCTTTTCCATGTCC  |
| <i>Btrc</i> F                | mouse           | AAGACTGTAATAATGGCGAACCC    |
| <i>Btrc</i> R                | mouse           | TCTCTTGGTTTATGCAAAGCCTG    |
| <i>Rhoa</i> F                | mouse           | AGCTTGTGGTAAGACATGCTTG     |
| <i>Rhoa</i> R                | mouse           | GTGTCCCATAAAGCCAACCTCTAC   |
| <i>Col1a1</i> F              | mouse           | GCTCCTCTTAGGGGCCACT        |
| <i>Col1a1</i> R              | mouse           | CCACGTCTCACCATTGGGG        |
| <i>Col1a2</i> F              | mouse           | GTAACCTCGTGCCTAGCAACA      |
| <i>Col1a2</i> R              | mouse           | CCTTTGTCAGAATACTGAGCAGC    |
| <i>Col3a1</i> F              | mouse           | CTGTAACATGGAACTGGGGAAA     |
| <i>Col3a1</i> R              | mouse           | CCATAGCTGAACTGAAAACCACC    |
| <i>Dpt</i> F                 | mouse           | TGGATGGGTGAATCTTAACCGC     |
| <i>Dpt</i> R                 | mouse           | TCAGAGCCTTCCTTCTTGCTA      |
| <i>Adgre1 (F4/80,Emr1)</i> F | mouse           | ACCACAATACCTACATGCACC      |
| <i>Adgre1 (F4/80,Emr1)</i> R | mouse           | AAGCAGGCGAGGAAAAGATAG      |
| <i>Tnfa</i> F                | mouse           | CTTCTGTCTACTGAACTTCGGG     |
| <i>Tnfa</i> R                | mouse           | CAGGCTTGTCACTCGAATTTTG     |
| <i>Mcp1</i> F                | mouse           | TAAAAACCTGGATCGGAACCAA     |
| <i>Mcp1</i> R                | mouse           | GCATTAGCTTCAGATTTACGGGT    |
| <i>Ihh</i> F                 | mouse           | CTCTTGCTACAAGCAGTTCA       |
| <i>Ihh</i> R                 | mouse           | CCGTGTTCTCCTCGTCCTT        |
| <i>Spp1 (Opn)</i> F          | mouse           | CTGACCCATCTCAGAAGCAGAATCT  |
| <i>Spp1 (Opn)</i> R          | mouse           | TCCATGTGGTCATGGCTTTTCATTGG |
| <i>Timp1</i> F               | mouse           | CTCAAAGACCTATAGTGCTGGC     |
| <i>Timp1</i> R               | mouse           | CAAAGTGACGGCTCTGGTAG       |
| <i>Last1</i> F               | mouse           | TGGTGA CTCTGGGATAAAGAA     |
| <i>Lats1</i> R               | mouse           | GGGAGTAACTCTGAATCCGAGAC    |
| <i>Lats2</i> F               | mouse           | GGACCCAGGAATGAGCAG         |

|                  |       |                         |
|------------------|-------|-------------------------|
| <i>Lats2 R</i>   | mouse | CCCTCGTAGTTTGCACCACC    |
| <i>Itpr1 F</i>   | mouse | CGTTTTGAGTTTGAAGGCGTTT  |
| <i>Itpr1 R</i>   | mouse | CATCTTGCGCCAATTCCCG     |
| <i>Itpr2 F</i>   | mouse | CCTCGCCTACCACATCACC     |
| <i>Itpr2 R</i>   | mouse | TCACCACTCTCACTATGTCTG   |
| <i>Itpr3 F</i>   | mouse | GGGCGCAGAACAACGAGAT     |
| <i>Itpr3 R</i>   | mouse | GAAGTTTTGCAGGTCACGGTT   |
| <i>Gnas F</i>    | mouse | CAGAGCCTCCATTGGGGTC     |
| <i>Gnas R</i>    | mouse | GCTTCTCGCTCAACTGGGG     |
| <i>Cyp27a1 F</i> | mouse | CCAGGCACAGGAGAGTACG     |
| <i>Cyp27a1 R</i> | mouse | GGGCAAGTGCAGCACATAG     |
| <i>Ch25h F</i>   | mouse | TGCTACAACGGTTCGGAGC     |
| <i>Ch25h R</i>   | mouse | AGAAGCCCACGTAAGTGATGAT  |
| <i>Prkaca F</i>  | mouse | AGATCGTCCTGACCTTTGAGT   |
| <i>Prkaca R</i>  | mouse | GGCAAACCGAAGTCTGTCC     |
| <i>Gramd1b F</i> | mouse | ACACAATGGGCTACTGTGAGG   |
| <i>Gramd1b R</i> | mouse | GGCTTGGTCTCGATGCTACT    |
| <i>Gramd1c F</i> | mouse | AACAAAGATCAGGCCACCG     |
| <i>Gramd1c R</i> | mouse | AGTGAGCTCTTCAGCTGTTCC   |
| <i>Adcy10 F</i>  | mouse | TGCCAGTGGGATTGTCTTC     |
| <i>Adcy10 R</i>  | mouse | TGAGGCCCAAACACTGATAC    |
| <i>ADCY10 F</i>  | human | ACAAAGTGTACGACCTTCATGC  |
| <i>ADCY10 R</i>  | human | CGAAGCTCAGATAAATAGCCCTG |

*Hprt*, hypoxanthine guanine phosphoribosyl transferase; *Taz (Wwtr1)*, WW domain containing transcription regulator 1; *Tgfb1*, transforming growth factor, beta 1; *Acta2*,  $\alpha$ -smooth muscle actin; *Btrc*, beta-transducin repeat containing protein; *Rhoa*, ras homolog family member A; *Col1a1*, collagen type I alpha 1; *Col1a2*, collagen type I alpha 2; *Col3a1*, collagen, type III, alpha 1; *Dpt*, dermatopontin; *Adgre1 (F4/80)*, adhesion G protein-coupled receptor E1; *Tnfa*, tumor necrosis factor- $\alpha$ ; *Mcp1*, monocyte chemoattractant protein-1; *lhh*, Indian hedgehog; *Spp1*, secreted phosphoprotein 1; *Timp1*, tissue inhibitor of metalloproteinase 1; *Lats1*, large tumor suppressor; *Lats2*, large tumor suppressor 2; *Itpr1*, inositol 1,4,5-trisphosphate receptor 1; *Itpr2*, inositol 1,4,5-trisphosphate receptor 2; *Itpr3*, inositol 1,4,5-trisphosphate receptor 3; *Gnas*, GNAS (guanine nucleotide binding protein, alpha stimulating) complex locus; *Cyp27a1*, cytochrome P450 family 27 subfamily a polypeptide 1; *Ch25h*, cholesterol 25-hydroxylase; *Prkaca*, protein kinase, cAMP dependent, catalytic, alpha; *Gramd1b*, GRAM domain containing 1B; *Gramd1c*, GRAM domain containing 1C; *Adcy10/ADCY10*, adenylate cyclase 10.
